# Supplementary material for: Air-conditioning and the adaptation cooling deficit in emerging economies
Source: PubMed Central journal article supplement (PMC8578436; doi:10.1038/s41467-021-26592-2), 2021-11-09
Supplement: 41467_2021_26592_MOESM1_ESM.pdf [file 41467_2021_26592_MOESM1_ESM.pdf]

# 1 **Air-Conditioning and the Adaptation Cooling Deficit in Emerging** 2 **Economies**

## 3 **Supplementary Information**

### 4 **Table of Contents**

- 5 1 Data overview
- 6 2 Empirical results
- 7 3 Projected changes in air-conditioning and electricity use

8

### 9 **1 Data overview**

10 We have built a household-level database using survey data over the period 2002-2018 for four  
11 emerging and developing countries - Brazil, India, Indonesia, and Mexico. The aim is to create a  
12 homogeneous database, where variables of interest are constructed in a uniform way across four  
13 different consumption expenditure surveys. These data have then been combined with sub-national  
14 regional climate data.

15 These four countries have a long tradition in collecting data on household characteristics and  
16 behaviors, and conduct expenditure surveys on a regular basis. In Brazil, since 1987, the IBGE (the  
17 Brazilian Institute of Geography and Statistics) has conducted household expenditure surveys covering  
18 the entire national territory every six or seven years. In India, since 1972-73, the National Sample  
19 Survey Office (NSSO) has conducted broad surveys every five years on household expenditures by.  
20 The Indonesian Government fields the National Socioeconomic Survey (SUSENAS), a set of large-  
21 scale multi-purpose socioeconomic surveys that were initiated in 1963-1964 and have been fielded  
22 every year or two since 1993 on a nationally representative level. In Mexico the National Institute of  
23 Geography and Statistics (INEGI) has conducted a household survey on income and expenditure every  
24 two years since 1992 (less regularly even since 1984).

25 In every country, surveys run over different years and periods. Supplementary Table 1 summarizes the  
26 data availability and the reference period across the four countries considered in this study. The  
27 information regarding the period of implementation is important when merging surveys with climate  
28 information. As of now, three waves are available for Brazil, Indonesia, and Mexico, including the  
29 most recent years (2016-2018), whereas only two waves are available for India.

30 Two levels of administrative units are included in the database. Level 1 includes administrative units  
31 such as States or Union Territories (these are similar to states but managed by the central government).  
32 These can be very large, such as Amazonas in Brazil, which has a territorial area of 1,559,000 square  
33 kilometers. Level 2 provides the level of administrative division and includes districts or municipalities  
34 (Supplementary Table 2). It is available for India, Indonesia, and Mexico. The survey on Brazil does  
35 not give information regarding the municipality or district where the households are located, as they  
36 want to preserve the identity of the families. States can be further stratified into stratum units: one for  
37 rural locations and three for urban locations - the capital of the State, the metropolitan region or other  
38 urban municipalities.

39 The weight variables available in the survey datasets have been used to obtain population-  
40 representative descriptive statistics. We have omitted strata and primary sampling unit (PSU)  
41 variables, given strong the incompatibilities and missing values among countries and across waves  
42 (e.g. in ENIGH 2004 and in all POF waves there are no PSU and strata variables).

43 The database has been broken down into six main sections describing, respectively, demographics and  
44 household characteristics, house features, income and expenditure patterns, energy use, durables  
45 ownership, and climate indicators.

46 For the first two sections, we have selected and harmonized basic information on the households. These  
47 include the number of total members and the number of members divided by gender and age. We have  
48 considered as adults individuals aged 16 and above, and as infants from newborns to 5 years of age.

49 To make information on the household heads coherent across surveys, we have elaborated common  
50 variables on education level, gender, literacy, and occupation's type and sector. Education level is  
51 based on school attainment data divided among 1) primary, 2) secondary or 3) higher educational  
52 levels. We have assumed 0) no education for no or incomplete primary schooling. We have not used  
53 data on years of education because none are available for India and Mexico. For the occupation sector  
54 we have distinguished between employees in the agricultural sector, including forestry, fishing,  
55 livestock, and those not. We have also gathered data on the living area and characteristics of dwellings.  
56 These include dummy variables to classify households dwelling in an urban area or not, as well as  
57 whether they own the house they live in or not and whether they have electricity access. Common  
58 categories across the different countries are identified to homogenize information on energy sources  
59 for cooking and lighting, sources of drinking water and types of toilet facilities (Supplementary Table  
60 3).

61 To compare and summarize information on the characteristics of dwellings across countries and waves,

62 we have created a set of categorical variables and used them to build a housing index. The housing  
63 index is a composite measure of a household's living conditions. It is calculated by using data about  
64 assets related to housing construction materials (walls and roof), as well as about the type of toilet  
65 facilities and access to drinking water. Each household is assigned a standardized score for each asset,  
66 depending on the type and quality of the selected asset. These scores are summed by household, and  
67 the final score is then ranked according to three categories, namely Low, Middle and High housing  
68 quality. The housing index sets a minimum value of 1 for low quality dwelling conditions, and a  
69 maximum value of 3 for high dwelling conditions.

70 We have gathered data on household income and expenditure. As figures about income are only  
71 available for Brazil and Mexico, we have used the total expenditure as a measurement of a household's  
72 economic level. Single survey expenditure values are reported in local currency units (LCU) by  
73 different reference periods. For each of them, we compute annual values and convert them into  
74 constant (2011) purchasing-power-parity (PPP) US dollars. To convert LCU to current USD PPP we  
75 have used the World Bank's PPP conversion factor for private consumption<sup>1</sup>. For converting from  
76 current USD PPP to 2011 constant USD PPP we have used the CPI Inflation Calculator from the U.S.  
77 Bureau of Labor Statistics<sup>2</sup>.

78 Our final dataset includes five expenditure categories (Supplementary Table 4): total expenditure,  
79 energy expenditure, electricity expenditure, food expenditure and medical expenditure. Total  
80 expenditure is based on aggregate reported values, except for Mexico, for which we noted some  
81 inconsistencies affecting the computation of non-monetary expenses across waves (see section on  
82 Mexico). To ensure consistency across years, Mexico's total expenditure comprises only its monetary  
83 expenditure. We have used total household expenditure in USD2011 PPP to compute total expenditure  
84 per adult equivalent (i.e. divided by the number of household members, imposing a weight of 1 for  
85 adults and a weight of 0.5 for minors).

86 Household ownership of a broad number of appliances (including air-conditioning, fans and  
87 refrigerators) and other devices (e.g. car, tv, radio) is reported through a set of dummy variables, where  
88 0 = "Not owned" and 1 = "Owned". For each country, we have constructed two variants of climate  
89 variables – annual Cooling Degree Days (CDDs), Units: °C days– by using daily dry-bulb and wet-  
90 bulb temperature.

91 We have merged climate and survey data at the district level, since it is the most pinpointed

---

<sup>1</sup> <https://data.worldbank.org/indicator/PA.NUS.PRVT.PP>

<sup>2</sup> [https://www.bls.gov/data/inflation\\_calculator.htm](https://www.bls.gov/data/inflation_calculator.htm)

92 disaggregated geographical information available for India, Indonesia, and Mexico, except for Brazil,  
93 whose data have been merged at the state level (Federal Unit), by stratum type. To do so, first the  
94 climate data are aggregated from the grid-cell level to the district (or state) levels utilizing (i) within  
95 country administrative boundaries (from geo-spatial shape files) at the respective admin level<sup>3</sup>; and (ii)  
96 routines in R (R Core Team, 2018) made available by open-source packages `sp`, `rgdal`, `raster` and  
97 `spatialEco`.

98 The remainder of this section provides a detailed description of the survey dataset for each country and  
99 its climate data.

100

101

---

<sup>3</sup> Admin levels 2 and 3 are for States and Districts, respectively.

|                                     |                                                                                                                                                                                                                                                       |
|-------------------------------------|-------------------------------------------------------------------------------------------------------------------------------------------------------------------------------------------------------------------------------------------------------|
| <b>Survey name</b>                  | Consumer Expenditure Survey (Pesquisa de Orçamentos Familiares - POF)                                                                                                                                                                                 |
| <b>Institution</b>                  | Brazilian Institute of Geography and Statistics (Instituto Brasileiro de Geografia e Estatística - IBGE)                                                                                                                                              |
| <b>Frequency</b>                    | Every six or seven years                                                                                                                                                                                                                              |
| <b>Survey waves</b>                 | 2002-2003, 2008-2009, 2017-2018                                                                                                                                                                                                                       |
| <b>Period of observation</b>        | POF 2002-2003: July 2002 to June 2003. POF 2008-2009: May 2008 to May 2009. POF 2017-2018: June 2017 to July 2018                                                                                                                                     |
| <b>Type</b>                         | Cross-Sectional                                                                                                                                                                                                                                       |
| <b>Coverage</b>                     | Occupied permanent private housing units and their residents in the area covered by the survey in both urban and rural areas                                                                                                                          |
| <b>Geographic information</b>       | National, federation units and stratum (1 rural, 3 urban)                                                                                                                                                                                             |
| <b>Observation-level</b>            | Household members                                                                                                                                                                                                                                     |
| <b>Weighting</b>                    | Each household of the subsample is associated with a sample weight or expansion factor that, attributed to the characteristics investigated by the POF, makes it possible to estimate the quantities of interest for the entire population            |
| <b>Total number of observations</b> | 162,363 (2002-2003: 48,473; 2008-2009: 55,970; 2017-2018: 57,920)                                                                                                                                                                                     |
| <b>Data URL</b>                     | <a href="https://www.ibge.gov.br/estatisticas/sociais/trabalho/9050-pesquisa-de-orcamentos-familiares.html?=&amp;t=downloads">https://www.ibge.gov.br/estatisticas/sociais/trabalho/9050-pesquisa-de-orcamentos-familiares.html?=&amp;t=downloads</a> |

104 We have concatenated *NÚMERO SEQUENCIAL*<sup>4</sup> (the sequential number for each of the Sample  
105 Sectors), *DV DO SEQUENCIAL* (one-digit code that verifies the sequential number assigned to the  
106 Sector Sample) and *NÚMERO DO DOMICILIO* (two-digit code, identifying the domicile, assigned  
107 sequentially to each household selected in each sector) in order to obtain a unique identifier for each  
108 household (*hhid*).

109 To elaborate descriptive statistics that are population-representative, we have used a weight variable  
110 available in the survey. For both waves POF reports two weight variables: *FATOR DE EXPANSÃO 1*  
111 and *FATOR DE EXPANSÃO 2*. Both variables identify the expansion factor attributed to the  
112 household. The former is the weight used for the survey design; the latter, which is the one we have  
113 opt for, is the adjusted weight that should be used to calculate estimates from the survey data.

114 In the first two waves we have created the dummy variable, *urban*, starting from *ESTRATO*  
115 *GEOGRÁFICO*, to identify whether the household lives in an urban or rural settlement. The variable  
116 consists of a sequence of two numbers that identify either the municipality of the capital, the rest of  
117 the metropolitan region or the rest of the federative urban units or a rural area. Thus, we associate the  
118 first three categories with dwelling in an urban area, while the latter category with dwelling in a rural  
119 area. In the 2017-2018 wave we have used the available specific variable *TIPO\_SITUAÇÃO\_REG*,  
120 which takes a value of 1 for urban households and a value of 2 for rural ones.

121 Aggregate (*total, energy, electricity and food*) expenditures are reported on a monthly basis in local  
122 currency (Brazilian real).

123 In POF waves revenues are reported on monthly basis in local currency. Among the different income  
124 variables available in the survey we have opted for *RENDA TOTAL MENSAL DA UC*. This  
125 corresponds to the value of the gross monthly income of the consumption unit (family), and it is  
126 obtained through the sum of the gross monetary income of all residents of the unit of consumption,  
127 obtained through labor, transfers, other income and the positive balance of the financial transaction,  
128 plus the portion related to the non-monetary income of the unit of consumption. Then, we compute it  
129 on an annual basis in \$2011 PPP.

130 The POF survey considers only employed respondents, without considering those that are inactive or  
131 unemployed. *POSIÇÃO NA OCUPAÇÃO* identifies a detailed range of possible positions as principal  
132 occupation. We have distributed them among our unique five occupation categories defining the  
133 household head's employment status (see Supplementary Table 3).

---

<sup>4</sup> Where not otherwise specified we report the original name of the variables common to the greatest number of waves. In some cases, small differences may emerge between waves.

134 For the other categorical variables we have adopted *SEXO* for a household head's gender; *CÓDIGO*  
135 *DE ATIVIDADE PRINCIPAL* for the household head's occupation sector; *CONDIÇÃO DE*  
136 *OCUPAÇÃO* for housing ownership; *MATERIAL QUE PRE- DOMINA NAS PAREDES EXTERNAS*  
137 for house walls; *MATERIAL QUE PREDOMINA NA COBERTURA* for house roof; *PROVENIÊNCIA*  
138 *DA ÁGUA (TIPO DE ABASTECIMENTO DE ÁGUA in 2002)* for drinking water; *ESCOADOURO*  
139 *SANITÁRIO* for toilet facilities;

140 For cooking fuel we have combined the following POF variables:

- 141 • *FOGÃO A GÁS*
- 142 • *FOGÃO A LENHA*
- 143 • *FOGÃO A CARVÃO*
- 144 • *FOGÃO A ENERGIA ELÉTRICA*
- 145 • *FOGÃO COM OUTRA FONTE*

146

147 For electricity access and lighting energy source we have combined the following POF variables:

- 148 • *REDE GERAL DE ENERGIA ELÉTRICA*
- 149 • *FONTE PRÓPRIA PARA ENERGIA ELÉTRICA*
- 150 • *DIESEL/GASOLINA/ GÁS PARA ENERGIA ELÉTRICA*
- 151 • *ENERGIA SOLAR PARA ENERGIA ELÉTRICA*
- 152 • *ENERGIA EÓLICA PARA ENERGIA ELÉTRICA*
- 153 • *ÁGUA PARA ENERGIA ELÉTRICA*
- 154 • *BIODIESEL PARA ENERGIA ELÉTRICA*
- 155 • *SISTEMA MISTO PARA ENERGIA ELÉTRICA*
- 156 • *OUTRA FONTE PARA ENERGIA ELÉTRICA*

157

158 In POF 2002 there is no information on house walls, roof materials and toilet type;

159

|                                     |                                                                                                                                                                                                                                                                                                                      |
|-------------------------------------|----------------------------------------------------------------------------------------------------------------------------------------------------------------------------------------------------------------------------------------------------------------------------------------------------------------------|
| <b>Survey name</b>                  | Household Consumer Expenditure, National Sample Survey (NSS)                                                                                                                                                                                                                                                         |
| <b>Institution</b>                  | National Sample Survey Office (NSSO), Ministry of Statistics and Programme Implementation, Government of India                                                                                                                                                                                                       |
| <b>Frequency</b>                    | Quinquennial from 1972-73 <sup>5</sup>                                                                                                                                                                                                                                                                               |
| <b>Survey waves</b>                 | 2004-2005, 2011-2012                                                                                                                                                                                                                                                                                                 |
| <b>Period of observation</b>        | Over 12 months, from July through June                                                                                                                                                                                                                                                                               |
| <b>Type</b>                         | Cross-Sectional                                                                                                                                                                                                                                                                                                      |
| <b>Coverage</b>                     | Randomly selected households based on sampling procedure                                                                                                                                                                                                                                                             |
| <b>Geographic information</b>       | The whole Indian Union except (i) the Leh (Ladakh) and Kargil districts of Jammu and Kashmir (in 2004-2005), (ii) the interior villages of Nagaland situated beyond five kilometers of the bus route, and villages on the Andaman and Nicobar Islands, inaccessible throughout the year (in 2004-2005 and 2011-2012) |
| <b>Observation-Level</b>            | Household members                                                                                                                                                                                                                                                                                                    |
| <b>Weighting</b>                    | The level sample size of State/Union Territories (UT) is allocated between two sectors (urban and rural) in proportion to population as per census 2001                                                                                                                                                              |
| <b>Total number of observations</b> | 226,306 (2004-2005: 124,644; 2011-2012: 101,662)                                                                                                                                                                                                                                                                     |
| <b>Data URL</b>                     | <a href="http://microdata.gov.in/nada43/index.php/catalog/central/about">http://microdata.gov.in/nada43/index.php/catalog/central/about</a>                                                                                                                                                                          |

161

162

<sup>5</sup> The 2009-2010 survey was repeated in 2011-12 because it was considered a non-normal year.



163 A unique household identification number (*HHID*) is provided across the different waves. It is a 9 digit  
164 sequence, composed by concatenating the First Stage Unit Serial number of the village/urban block  
165 (FSU), Hamlet Group Sub Stratum number, Second stage stratum number and Sample household  
166 number.

167 Double weighting is applied to an urban sector subject, provided that urban sample size for larger states  
168 not exceed the rural sample size. A variable reporting weights (or multipliers) is given at the end of  
169 each record (combined multiplier), and is used to compute population-representative statistics.

170 *Sector* is the variable that in the survey identifies households dwelling in a rural or urban area. We use  
171 it to create the dummy variable *urban* across all waves.

172 Information about household members and composition were derivable from demographic variables  
173 available in the survey, including *Relation*, *Sex*, *Age*, *HH Size* (respectively *B4 q3*, *B4 q4*, *B4 q5*, *B3*  
174 *q1* in 2004-2005). We have used them to construct variables on a household head's gender and age, as  
175 well as the number of members, adults, children and infants within the household.

176 No variables reporting income values are available in the survey.

177 Two reference periods are reported for monthly per capita consumer expenditure (MPCE): a Uniform  
178 Reference Period (URP) based on data collected with a 30- day reference period for all items, a Mixed  
179 Reference Period (MRP) based on data with a 365-day reference period wherever available, and a 30-  
180 day reference period for other items. For the purpose of this work we have used the MRP estimate of  
181 per capita consumption (*MPCE MRP*). Expenditure amounts include the sum total of monetary values  
182 of all items (i.e. goods and services) consumed by the household on domestic account during the  
183 reference period. It is provided on a per capita basis (divided by household size) and in local currency  
184 units (Rs).

185 Monthly household expenditure values are available for energy and electricity. As for food  
186 expenditure, values are provided in sub-categories (e.g. cereals, pulses, milk and milk products, etc.)  
187 that need to be aggregated. Medical expenditure includes figures on institutional (incurred as an in-  
188 patient of a medical institution) and non-institutional expenses.

189 Categorical variables are constructed starting from the following variables:

- 190 • *Education* (*B4 q7* in 2004-2005) for the household head's education level (*edu\_head\_2*);
- 191 • *HH Type code* (*B3 q4* in 2004-2005) for the household head's occupation (*occupation\_head*);
- 192 • *NIC 2008* (*NIC 1998* in 2004-2005) for the occupation sector of the house- hold head  
193 (*sector\_head*). NIC codes are provided for each economic activity according to the National

194 Industrial Classification. We use them to distinguish households working in the agriculture,  
195 forestry and fishing sectors (codes starting with 01, 02, 03) from those involved in other  
196 economic sectors;

- 197 • *Dwelling unit Code (B3 q16 in 2004-2005)* for house ownership (*ownership\_d*); Information  
198 on other house characteristics (i.e. size, walls, roofs) is not available,
- 199 • *Lighting Code (B3 q18 in 2004-2005)* to determine whether a household has access to  
200 electricity (*ely\_access*), and the lighting source (*lighting\_source*);
- 201 • *Cooking Code (B3 q17 in 2004-2005)* for the energy sources used for cooking  
202 (*cooking\_source*);
- 203 • Information on sources of drinking water and type of toilet facility are not available;
- 204 • Ownership of durables and the respective expenditure are reported for a large number of items  
205 (*Whether Possesses and Expenditure Durables in 2011-2012, B11 q3, B11 q14 in 2004-2005*).

206

207 **Indonesia - SUSENAS**

|                                     |                                                                                                                                                    |
|-------------------------------------|----------------------------------------------------------------------------------------------------------------------------------------------------|
| <b>Survey name</b>                  | National Socio-Economic Survey (Survei Sosial Ekonomi Nasional - SUSENAS)                                                                          |
| <b>Institution</b>                  | Indonesian Central Statistics Agency (Badan Pusat Statistik - BPS)                                                                                 |
| <b>Frequency</b>                    | Irregular since 1963, nationally representative since 1993                                                                                         |
| <b>Survey waves</b>                 | 2004, 2012, 2017                                                                                                                                   |
| <b>Period of observation</b>        | July (2004), March to December (2012), March (2017)                                                                                                |
| <b>Type</b>                         | Cross-Sectional                                                                                                                                    |
| <b>Coverage</b>                     | Covers a large representative sample of households across Indonesia                                                                                |
| <b>Geographic information</b>       | National, province, regency/city (district), sub-district and village levels.<br>Sub-district and village identification not available after 2012  |
| <b>Observation level</b>            | Household members                                                                                                                                  |
| <b>Weighting</b>                    | Frequency weights computed within each stratum (census block which is an administrative/geographical unit) as the inverse of the sampling fraction |
| <b>Total number of observations</b> | 648,643 (2004: 65,254; 2012: 286,113; 2017: 297,276)                                                                                               |
| <b>Data URL</b>                     | <a href="https://mikrodata.bps.go.id/mikrodata/index.php/catalog/">https://mikrodata.bps.go.id/mikrodata/index.php/catalog/</a> SUSENAS            |

208

209

210 To uniquely identify SUSENAS households across waves (*hhid*), we have used the available variable  
211 *urut*. As of 2017, there are 34 provinces (*povinsi*) and 514 districts (*kabupaten/kota*) in Indonesia.  
212 However, the number of states and districts has changed in the period 2004-2017. The number of  
213 provinces has increased from 30 to 34 and the number of districts from 373 to 514.

214 To make descriptive statistics that are population-representative, we have used weights available in  
215 the survey, namely *wert*;

216 The variable *b1r5* identifies households dwelling in a rural or urban settlement. We use it to create the  
217 dummy variable *urban* across all waves;

218 In SUSENAS there is no information about income. Total expenditure at monthly level in local  
219 currency is reported in the variable *expend*;

220 There is no total energy expenditure, but single fuel expenditures are available (tri-monthly). They are  
221 identified by different codes (*kode*) in variable *b42k6* (*electricity* = 238, *lpg* = 242, *city gas* = 244  
222 *kerosene* = 246, *generator fuel* = 248, *charcoal*= 253, *firewood*=254);

223 For the categorical variables we adopt *jk* for the household head's gender; *b6r3* for housing ownership;  
224 *b6r6* for house walls; *b6r5* for house roof; *b6r14a* for electricity access and lighting energy source;  
225 *b6r15* for cooking fuel; *b6r9a* for drinking water; *b6r13b* for toilet facilities;

226 Information on education is available as number of years attended in school. Both education and  
227 occupation of the household head are created by using a combination of different variables (*b5r14* to  
228 *b5r17* for education, *b5r24a1*, *b5r25*, *b5r26*, *b5r31* for occupation);

229 Information on the ownership of a wide range of goods is provided under variable *b7r4*. Ownership of  
230 air conditioning is not available in the 2004 wave, whereas ownership of fans is unavailable in all  
231 waves.

232

|                                     |                                                                                                                                                      |
|-------------------------------------|------------------------------------------------------------------------------------------------------------------------------------------------------|
| <b>Survey Name</b>                  | Household Income and Expenditure Survey (Encuesta Nacional de Ingresos y Gastos de los Hogares - ENIGH)                                              |
| <b>Institution</b>                  | Instituto Nacional de Estadística, Geografía e Informática                                                                                           |
| <b>Frequency</b>                    | Biennial (since 1992)                                                                                                                                |
| <b>Survey waves</b>                 | 2004, 2012, 2016                                                                                                                                     |
| <b>Period of observation</b>        | August to November                                                                                                                                   |
| <b>Type</b>                         | Cross-Sectional                                                                                                                                      |
| <b>Coverage</b>                     | It is constituted by households of national or foreign people, who habitually reside in private housing units within the national territory.         |
| <b>Geographical information</b>     | National, federal entity and municipality levels                                                                                                     |
| <b>Observation- level</b>           | Household members                                                                                                                                    |
| <b>Weighting</b>                    | Probability survey weights. Taking account of the weights, the sample is representative at both the national and subnational levels (urban vs rural) |
| <b>Total number of observations</b> | 101, 907 (2004: 22, 595; 2012: 9002; 2016: 70, 310)                                                                                                  |
| <b>Data URL</b>                     | <a href="https://www.inegi.org.mx/programas/enigh/nc/2016/">https://www.inegi.org.mx/programas/enigh/nc/2016/</a>                                    |

235 There are two versions of the ENIGH survey: the traditional and the new construction. In 2008, INEGI  
236 started to publish the results of the survey under a new construction methodology. The main difference  
237 among the two versions relies on how revenues are aggregated in reported income variables. For the  
238 new construction, the aggregation rules are in accordance with UN recommendations. In our analysis,  
239 we have opted for the traditional version for the 2004 wave (since it was the only one available), while  
240 we have used the new construction for both the 2012 and the 2016 waves;

241 There are two identifiers of the respondent, one associated with the house, *folio viv*, and another  
242 associated with the household, *folio hog*. We concatenate the two in order to obtain a unique identifier  
243 for each household (*hhid*);

244 In 2004 INEGI collected households and dwelling variables in the same dataset, and these have a  
245 unique identifier *FOLIO* - a sequence of 11 digits. The first 10 digits are associated with the dwelling.  
246 The last one identifies the households dwelling in that house. If the eleventh digit of *FOLIO* is equal  
247 to 0, this refers to the main household; while, if *FOLIO* ends with a digit greater than 0, this refers to  
248 other households dwelling in the same house. Since INEGI reports data about dwelling characteristics  
249 - e.g. having an air conditioner, house wall materials - only for the main household, we assume that  
250 they also apply to the secondary families;

251 To elaborate descriptive statistics that are population-representative, we have used the weight variable  
252 *factor* in the ENIGH survey 2016. In 2012 and in 2004 there were two factors of expansion, *factor viv*  
253 and *factor hog* (*HOG* in 2004). Since our analysis is at the household level, we have used *factor hog*  
254 as weighting variable;

255 In all three waves we have created the dummy variable *urban*, starting from *tam loc* (*ESTRATO* in  
256 2004) to identify whether the household dwells in an urban or a rural settlement. This variable  
257 identifies urban areas as localities of 2500 or more inhabitants, while rural areas as localities with  
258 fewer than 2500 inhabitants;

259 Aggregate (*total*, *energy*, *electricity* and *food*) expenditures are reported on a tri- monthly basis in local  
260 currency (pesos);

261 As *income* we use the total current income (*ingcor*), which corresponds to the sum of both monetary  
262 and non-monetary revenues. Other revenues are reported on a tri-monthly basis in local currency. Thus,  
263 we compute annual income and convert it into \$2011 PPP through the same procedure as for  
264 expenditure;

265 We construct the *occupation\_head* variable through the following procedure:

- 266 • Using *id trabajo* (*COD TRAB* in 2004), we only focus on the household-head's primary job  
267 occupation;
- 268 • We have divided household-heads between those that worked in the previous month and  
269 those that did not (*trabajo mp* in 2012-2016; *TRABAJO* in 2004). From inactive respondents,  
270 we have removed household-heads who declared to be looking for a job, identifying them as  
271 "unemployed" (*act buscot* in 2012-2016; *BUS TRAB* in 2004). Based on their contract, we  
272 have distinguished workers between the self-employed, employees and seasonal workers  
273 (*indep, subor, tipocontr* in 2012-2016; *POSICION09, CONTR171* in 2004);

274 For the other category variables we have adopted *sexo jefe* (*SEXO* in 2004) for the household head's  
275 gender; *educa jefe* (*ED FORMAL* in 2004) for the household head's education level; *scian* (*SCIAN151*  
276 in 2004) for the household head's occupation sector; *tenencia* (*TENENCIA 12* in 2004) for housing  
277 ownership; *mat pared* (*MUROS01* in 2004) for house walls; *mat techos* (*TECHOS02* in 2004) for house  
278 roof; *disp elect* (*LUZ21* in 2004) for electricity access and lighting energy source; *combustible*  
279 (*COMBUS11* in 2004) for cooking fuel; *disp agua* (*AGUA15* in 2004) for drinking water; *sanit agua*  
280 (*BANO17* in 2004) for toilet facilities;

281 There is no information on household energy and electricity consumption in kWh. Hence, we have  
282 gathered state-level electricity price information from INEGI's Consumer Price Index<sup>6</sup>. We have then  
283 divided households' electricity expenditure by prices to get electricity demand;

284 For most goods, ENIGH provides the number of durables owned. We use this number to generate the  
285 ownership dummy variables.

286

---

<sup>6</sup> <https://www.inegi.org.mx/programas/inpc/2010/>

287 **Climate data**

|                              |                                                                                                  |
|------------------------------|--------------------------------------------------------------------------------------------------|
| <b>Data type</b>             | ‘DegDays 0p25 1970-2018’                                                                         |
| <b>Raw data</b>              | 3-hourly temperature (°C) (GLDAS, Rodell et al., 2004) aggregated to daily timesteps             |
| <b>Climate variable</b>      | Long-term average Dry (CDD <sub>db</sub> ) and Wet Bulb (CDD <sub>wb</sub> ) Cooling Degree Days |
| <b>Frequency</b>             | Annual                                                                                           |
| <b>Resolution</b>            | State and District level                                                                         |
| <b>Period of observation</b> | 1970-2016                                                                                        |
| <b>Data source</b>           | Mistry M.N., 2019a; Mistry M.N., 2019b                                                           |

288

289



290 Two climate variables (annual CDD dry-bulb and CDD wet-bulb - *CDDdb* and *CDDwb*) have been  
291 computed at the grid-cell level before being spatially aggregated to the district or state/stratum level.  
292 Our preferred variable, *CDD wet-bulb*, takes into account the influence of relative humidity on  
293 evaporative cooling, which can have an important role in the countries in our study, as they are tropical  
294 countries that feature not only spatial heterogeneity in relative humidity, but also coastal regions with  
295 high relative humidity. When relative humidity is 100%, dry-bulb and wet-bulb temperature  
296 measurements coincide; otherwise wet-bulb temperature (and therefore also *CDD wet-bulb*), are  
297 always lower.

298 Both variants of the CDDs, measured in annual °C days, are assembled by using the input  
299 meteorological fields at a high-spatial resolution (0.25° gridded, about 27 km x 27 km at the equator)  
300 from the Global Land Data Assimilation System (GLDAS), covering the 1970-2016 period. At each  
301 grid-cell the CDDs are calculated by using the American Society of Heating, Refrigerating and Air-  
302 Conditioning (ASHRAE) method, and by fixing the baseline temperature at 24 °C, as opposed to the  
303 more commonly used threshold of 18°C, which works better for temperate countries. As sensitivity  
304 checks, we also use a baseline temperature of 22 °C for both dry- and wet- bulb CDDs.

305 We have computed long-term climatological averages of degree-days at the administrative level in two  
306 ways: 1) starting in 1970 up to the year the survey was conducted, 2) considering the ten years  
307 preceding the individual survey years. Since for Brazil and India the survey was carried out over two  
308 years, we have opted for the year the wave started - namely, 2002, 2008 and 2017 for Brazil, and 2004,  
309 2011 for India.

310 We have merged climate and survey data at the district level for India, Indonesia, and Mexico, while  
311 for Brazil at the lowest administrative unit at which we can locate households, which is the state  
312 (Federal Unit). Within each state, we have been able to distinguish household locations across four  
313 strata: rural, capital, metropolitan region, and other urban areas. Gridded CDDs are subsequently  
314 aggregated to subnational boundaries in each of the four countries. Subnational population weighted  
315 degree-days for the four countries have been assembled by using population data from CIESIN<sup>7</sup>. The  
316 1° gridded populations are matched to the gridded degree-days by using CDO<sup>8</sup> remapping operators,  
317 with prior weighting of the degree-days by population to the district level boundaries.

---

<sup>7</sup> Center for International Earth Science Information Network - CIESIN - Columbia University. 2017. Gridded Population of the World, Version 4 (GPWv4): Population Count, Revision 10. Palisades, NY: NASA Socioeconomic Data and Applications Center (SEDAC). <https://doi.org/10.7927/H4PG1PPM>.

<sup>8</sup> Schulzweida, Uwe (Max Planck Institute for Meteorologie). 2018. "Climate Data Operators (CDO) User Guide, Version 1.9.0.

Supplementary Table 1: Overview of data availability

|        | Brazil                | India                 | Indonesia        | Mexico         |
|--------|-----------------------|-----------------------|------------------|----------------|
| Wave 1 | July 2002 - June 2003 | July 2004 - June 2005 | July 2004        | Aug - Nov 2004 |
| Wave 2 | May 2008 - May 2009   | July 2011 - June 2012 | March - Dec 2012 | Aug - Nov 2012 |
| Wave 3 | June 2017 - July 2018 | n.a.                  | March 2017       | Aug - Nov 2016 |

Supplementary Table 2: Administrative divisions

|         | Brazil           | India                      | Indonesia   | Mexico         |
|---------|------------------|----------------------------|-------------|----------------|
| Level 1 | Federation Units | States & Union Territories | Provinces   | Provinces      |
|         | 27               | 35/35                      | 30/33/33    | 32             |
| Level 2 | Stratum          | Districts                  | Regencies   | Municipalities |
|         | 4x27             | 577/583                    | 360/497/491 | 490/369/919    |

Supplementary Table 3: Categorical variables

| <b>Variables</b>       | <b>Var. Code</b>         | <b>Description</b>                                 | <b>Categories</b>                                                                                             |
|------------------------|--------------------------|----------------------------------------------------|---------------------------------------------------------------------------------------------------------------|
| Urban                  | <i>urban</i>             | Living or not in an urban area                     | 0 = Rural ; 1 = Urban                                                                                         |
| Gender Head            | <i>sex_head</i>          | Household head's gender                            | 1 = Male; 2 = Female                                                                                          |
| Education Head         | <i>edu_head_2</i>        | Household head's education level                   | 0 = No education; 1 = Primary; 2 = Secondary; 3 = Above                                                       |
| Occupation Head        | <i>occupation_head</i>   | Household head's employment status                 | 0 = Inactive; 1 = Unemployed; 2 = Self-employed; 3 = Regular wage earning; 4 = Casual worker; 5 = Other       |
| Sector Head            | <i>sector_head</i>       | Household head's occupation sector                 | 0 = Other sectors; 1 = Agriculture (including forestry, fishing, livestock)                                   |
| Dwelling Ownership     | <i>ownership_d</i>       | Whether household owns the dwelling where it lives | 0 = No; 1 = Yes                                                                                               |
| House Walls            | <i>house_walls</i>       | Materials of the dwelling's walls                  | 1 = Masonry; 2 = Wood; 3 = Earth structures; 4 = Metal and asbestos; 5 = Waste materials 6 = Other            |
| House Roof             | <i>house_roof</i>        | Materials of the dwelling's roof                   | 1 = Tile; 2 = Concrete; 3 = Wood; 4 = Metal and asbestos; 5 = Earth structure; 6 = Waste materials; 7 = Other |
| Electricity Access     | <i>ely_access</i>        | Access to electricity                              | 0 = No; 1 = Yes                                                                                               |
| Lighting Energy Source | <i>lighting_source</i>   | Energy source for lighting in the dwelling         | 0 = No lighting; 1 = Public supply/electric utilities; 2 = Renewable plant; 3 = Fossil fuels; 4 = Other       |
| Cooking Energy Source  | <i>cooking_source</i>    | Energy source for cooking                          | 0 = No arrangements; 1 = Electricity; 2 = Gas; 3 = Coal; 4 = Firewood; 5 = Other                              |
| Drinking Water Source  | <i>drinking_water</i>    | Source of fresh and drinking water                 | 1 = Piped water; 2 = bottled water; 3 = Wells and springs (including lakes, river); 4 = other                 |
| Toilet                 | <i>toilet</i>            | Toilet type                                        | 0 = No toilet; 1 = Flush; 2 = Pit and latrine; 3 = Other                                                      |
| Housing Index          | <i>housing_index_lab</i> | Synthesis measure of dwelling conditions           | 1 = Low quality; 2 = Medium quality; 3 = High quality                                                         |

Supplementary Table 4: Descriptive statistics. Selected variables in the database

|                           | Brazil 2003 |          | Brazil 2009 |          | Brazil 2018 |          | Mexico 2004 |          | Mexico 2012 |          | Mexico 2016 |          |
|---------------------------|-------------|----------|-------------|----------|-------------|----------|-------------|----------|-------------|----------|-------------|----------|
|                           | Mean        | SD       | Mean        | SD       | Mean        | SD       | Mean        | SD       | Mean        | SD       | Mean        | SD       |
| AC                        | 0.01        | 0.09     | 0.09        | 0.28     | 0.20        | 0.40     | 0.04        | 0.19     | 0.12        | 0.33     | 0.14        | 0.35     |
| Fan                       | 0.60        | 0.49     | 0.62        | 0.49     | 0.76        | 0.43     | 0.54        | 0.50     | 0.47        | 0.50     | 0.48        | 0.50     |
| Refrigerator              | 0.86        | 0.35     | 0.92        | 0.28     | 0.98        | 0.14     | 0.79        | 0.41     | 0.82        | 0.39     | 0.86        | 0.35     |
| Urban                     | 0.85        | 0.36     | 0.85        | 0.35     | 0.86        | 0.35     | 0.77        | 0.42     | 0.78        | 0.41     | 0.78        | 0.41     |
| Total exp (USD2011 PPP)   | 14644.32    | 22198.35 | 19344.54    | 29309.79 | 22879.01    | 31150.79 | 8941.12     | 10964.58 | 11309.29    | 12866.61 | 12502.30    | 12813.61 |
| Exp pae (USD2011 PPP)     | 5550.61     | 9400.03  | 7815.43     | 13358.90 | 9747.70     | 14383.69 | 3031.42     | 4585.54  | 4162.75     | 6021.74  | 4631.66     | 5772.92  |
| Energy exp (USD2011 PPP)  | 506.75      | 398.59   | 626.98      | 555.28   | 824.58      | 574.54   | 468.06      | 591.98   | 472.84      | 597.29   | 520.85      | 541.54   |
| Ely exp (USD2011 PPP)     | 360.08      | 360.94   | 465.89      | 514.86   | 607.50      | 528.09   | 375.11      | 519.55   | 274.61      | 455.34   | 281.71      | 422.10   |
| Medical exp (USD2011 PPP) | 1243.15     | 7074.99  | 1345.80     | 3168.54  | 2862.72     | 4295.45  | 343.61      | 1810.12  | 281.62      | 1366.05  | 337.52      | 1644.36  |
| Food exp (USD2011 PPP)    | 2745.60     | 2852.61  | 3261.98     | 3234.13  | 3631.78     | 3726.63  | 2730.26     | 3335.88  | 3810.63     | 2789.03  | 4375.67     | 3286.14  |
| Electricity consump (kWh) | 1766.52     | 1323.02  | 1956.01     | 1551.76  | 1953.88     | 1556.37  | n/a         | n/a      | 2071.65     | 2002.14  | 2098.60     | 2023.17  |
| N. members                | 3.63        | 1.83     | 3.30        | 1.65     | 3.01        | 1.49     | 4.04        | 1.99     | 3.72        | 1.88     | 3.67        | 1.83     |
| Share under 16            | 0.24        | 0.23     | 0.21        | 0.23     | 0.16        | 0.21     | 0.23        | 0.23     | 0.23        | 0.23     | 0.23        | 0.23     |
| Share infants             | 0.09        | 0.15     | 0.07        | 0.13     | 0.06        | 0.12     | 0.10        | 0.15     | 0.09        | 0.15     | 0.08        | 0.14     |
| Literacy head             | 0.77        | 0.42     | 0.90        | 0.29     | 0.85        | 0.36     | 0.89        | 0.31     | 0.90        | 0.29     | 0.92        | 0.26     |
| House ownership           | 0.72        | 0.45     | 0.73        | 0.45     | 0.73        | 0.45     | 0.73        | 0.45     | 0.68        | 0.46     | 0.69        | 0.46     |
| Electricity access        | 0.96        | 0.20     | 0.98        | 0.13     | 0.99        | 0.07     | 0.99        | 0.12     | 0.99        | 0.09     | 1.00        | 0.07     |
| Housing index             | 1.48        | 0.50     | 2.81        | 0.43     | 2.85        | 0.37     | 2.81        | 0.42     | 2.85        | 0.42     | 2.89        | 0.35     |
| Car                       | 0.30        | 0.46     | 0.33        | 0.47     | 0.46        | 0.50     | 0.27        | 0.44     | 0.27        | 0.44     | 0.28        | 0.45     |
| TV                        | 0.89        | 0.31     | 0.94        | 0.23     | 0.97        | 0.18     | 0.92        | 0.27     | 0.92        | 0.27     | 0.94        | 0.25     |
| CDDs dry-bulb (24 deg)    | 529.17      | 380.66   | 500.21      | 391.90   | 492.15      | 402.52   | 343.35      | 393.56   | 373.10      | 414.55   | 388.31      | 412.46   |
| CDDs wet-bulb (24 deg)    | 193.79      | 203.71   | 189.03      | 213.09   | 187.36      | 226.64   | 102.61      | 158.41   | 124.80      | 177.02   | 118.48      | 170.27   |
| CDDs dry-bulb (22 deg)    | 1053.49     | 583.21   | 1001.31     | 598.01   | 979.50      | 617.42   | 593.06      | 622.46   | 651.18      | 652.12   | 675.89      | 638.38   |
| CDDs wet-bulb (22 deg)    | 482.45      | 339.81   | 463.06      | 351.58   | 452.84      | 366.18   | 217.87      | 292.81   | 250.09      | 317.14   | 240.15      | 305.29   |

  

|                           | Indonesia 2004 |         | Indonesia 2012 |         | Indonesia 2017 |         | India 2005 |         | India 2012 |         |
|---------------------------|----------------|---------|----------------|---------|----------------|---------|------------|---------|------------|---------|
|                           | Mean           | SD      | Mean           | SD      | Mean           | SD      | Mean       | SD      | Mean       | SD      |
| AC                        | n/a            | n/a     | 0.05           | 0.21    | 0.08           | 0.27    | 0.08       | 0.26    | 0.12       | 0.32    |
| Fan                       | n/a            | n/a     | n/a            | n/a     | n/a            | n/a     | 0.52       | 0.50    | 0.73       | 0.45    |
| Refrigerator              | 0.21           | 0.41    | 0.36           | 0.48    | 0.54           | 0.50    | 0.12       | 0.33    | 0.20       | 0.40    |
| Urban                     | 0.48           | 0.50    | 0.50           | 0.50    | 0.53           | 0.50    | 0.27       | 0.44    | 0.32       | 0.46    |
| Total exp (USD2011 PPP)   | 3058.30        | 3820.84 | 7388.83        | 9531.56 | 10058.63       | 9810.02 | 3332.24    | 2810.94 | 5514.13    | 5098.54 |
| Exp pae (USD2011 PPP)     | 969.04         | 1025.58 | 2389.18        | 2843.42 | 3310.71        | 3045.11 | 927.70     | 822.38  | 1642.18    | 1611.93 |
| Energy exp (USD2011 PPP)  | 312.37         | 345.24  | 272.08         | 247.60  | 390.86         | 499.21  | 323.29     | 229.89  | 464.04     | 307.27  |
| Ely exp (USD2011 PPP)     | 144.82         | 180.17  | 118.79         | 186.81  | 248.66         | 149.09  | 183.83     | 183.83  | 185.62     | 243.81  |
| Medical exp (USD2011 PPP) | n/a            | n/a     | 210.66         | 1514.16 | 425.65         | 1947.33 | 308.87     | 734.28  | 468.14     | 1242.36 |
| Food exp (USD2011 PPP)    | n/a            | n/a     | 3673.80        | 2458.50 | 5120.81        | 3364.60 | 1626.25    | 1025.58 | 2410.25    | 1564.59 |
| Electricity consump (kWh) | 957.94         | 1061.26 | 890.37         | 8649.57 | 1392.84        | 1740.10 | 798.41     | 1427.65 | 931.76     | 975.85  |
| N. members                | 3.93           | 1.69    | 3.87           | 1.68    | 3.76           | 1.65    | 4.74       | 2.41    | 4.43       | 2.21    |
| Share under 16            | 0.27           | 0.22    | 0.27           | 0.21    | 0.24           | 0.21    | 0.31       | 0.25    | 0.27       | 0.24    |
| Share infants             | 0.10           | 0.14    | 0.10           | 0.16    | 0.09           | 0.14    | 0.11       | 0.16    | 0.09       | 0.14    |
| Literacy head             | 0.89           | 0.31    | 0.92           | 0.27    | 0.94           | 0.23    | 0.62       | 0.49    | 0.68       | 0.47    |
| House ownership           | 0.80           | 0.40    | 0.80           | 0.40    | 0.80           | 0.40    | 0.85       | 0.36    | 0.84       | 0.37    |
| Electricity access        | 0.91           | 0.29    | 0.96           | 0.13    | 0.98           | 0.08    | 0.65       | 0.48    | 0.80       | 0.40    |
| Housing index             | 2.51           | 0.57    | 2.64           | 0.54    | 2.79           | 0.44    | n/a        | n/a     | n/a        | n/a     |
| Car                       | 0.05           | 0.22    | 0.08           | 0.27    | 0.11           | 0.31    | 0.02       | 0.14    | 0.04       | 0.20    |
| TV                        | 0.68           | 0.47    | 0.09           | 0.29    | 0.13           | 0.34    | 0.39       | 0.49    | 0.59       | 0.49    |
| CDDs dry-bulb (24 deg)    | 705.58         | 472.68  | 663.42         | 446.09  | 658.39         | 428.99  | 1037.23    | 439.16  | 1045.07    | 448.12  |
| CDDs wet-bulb (24 deg)    | 318.59         | 315.16  | 327.01         | 326.62  | 328.20         | 327.47  | 297.15     | 196.23  | 299.49     | 197.71  |
| CDDs dry-bulb (22 deg)    | 1299.55        | 630.89  | 1247.22        | 607.76  | 1248.98        | 585.56  | 1547.99    | 567.49  | 1552.28    | 577.83  |
| CDDs wet-bulb (22 deg)    | 678.71         | 511.54  | 676.47         | 515.02  | 671.57         | 511.16  | 527.54     | 271.48  | 523.48     | 271.46  |

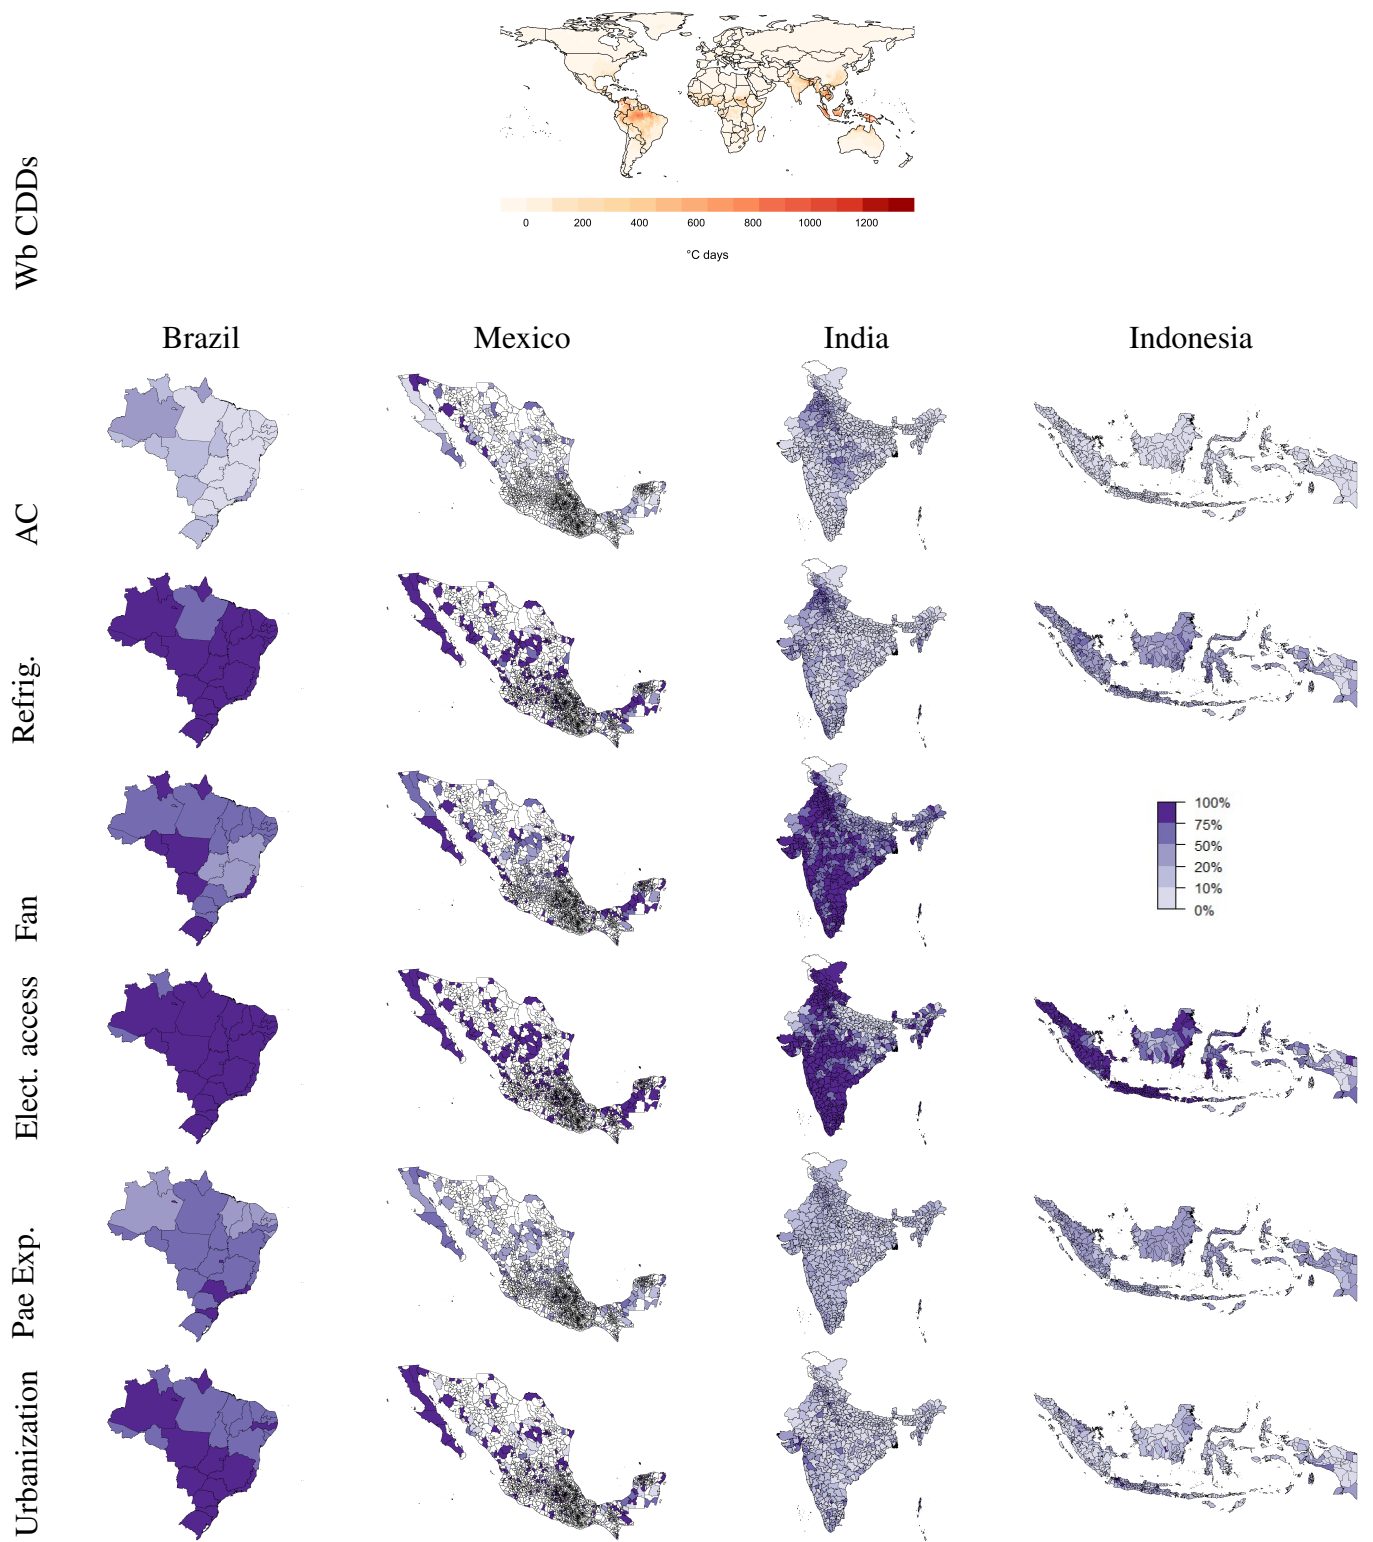

Supplementary Figure 1: Spatial distribution of ownership of AC, fans, refrigerators, per adult equivalent (pae) expenditure, electricity access, urbanization in 2012 (Brazil 2009). Maps are generated using the sp, rgdal, and raster R packages.

## 2 Empirical results

Supplementary Table 5: Logit models with state fixed effects using CDD wet-bulbs. Marginal Effects

| Variables                  | Brazil                    |                          |                            | India                      |                           |                          | Indonesia                  |                          |                            | Mexico                    |                          |  |
|----------------------------|---------------------------|--------------------------|----------------------------|----------------------------|---------------------------|--------------------------|----------------------------|--------------------------|----------------------------|---------------------------|--------------------------|--|
|                            | AC<br>(1)                 | FAN<br>(2)               | REF<br>(3)                 | AC<br>(4)                  | FAN<br>(5)                | REF<br>(6)               | AC<br>(7)                  | REF<br>(8)               | AC<br>(9)                  | FAN<br>(10)               | REF<br>(11)              |  |
| Mean CDD wet-bulb          | -0.000277***<br>(0.00006) | 0.000455***<br>(0.00013) | 0.000111***<br>(0.00002)   | -0.000373***<br>(8.68e-05) | -0.000322*<br>(0.000173)  | 0.000168<br>(0.000195)   | -2.58e-05***<br>(6.84e-06) | 5.20e-05**<br>(0.000108) | -0.000609***<br>(0.000223) | 0.000929***<br>(0.000428) | 9.62e-06<br>(9.09e-05)   |  |
| Total Expenditure (Log)    | 0.0930***<br>(0.00184)    | 0.102***<br>(0.00314)    | 0.0212***<br>(0.00072)     | 0.0558***<br>(0.00456)     | 0.113***<br>(0.00766)     | 0.356***<br>(0.00946)    | 0.0162***<br>(0.000650)    | 0.423***<br>(0.00655)    | 0.0277***<br>(0.00341)     | 0.135***<br>(0.00838)     | 0.0717***<br>(0.00335)   |  |
| CDD wb x Log Exp           | 5.49e-05***<br>(0.00001)  | -7.78e-06<br>(0.00001)   | -1.31e-05***<br>(1.99e-06) | 5.56e-05***<br>(1.06e-05)  | 7.92e-05***<br>(2.27e-05) | -1.36e-08<br>(2.35e-05)  | 4.26e-06***<br>(7.67e-07)  | 1.97e-05<br>(1.23e-05)   | 8.23e-05***<br>(2.55e-05)  | 5.52e-05<br>(4.91e-05)    | 7.87e-06<br>(1.03e-05)   |  |
| Urban (Yes = 1)            |                           |                          |                            | 0.0318***<br>(0.00293)     | 0.0588***<br>(0.00361)    | 0.129***<br>(0.00485)    | 0.0145***<br>(0.000712)    | 0.178***<br>(0.00640)    | 0.0202***<br>(0.00467)     | 0.0794***<br>(0.0116)     | 0.0257***<br>(0.00383)   |  |
| HH size                    | -0.0130***<br>(0.00079)   | -0.00573***<br>(0.00127) | 8.79e-05<br>(0.00033)      | -0.00457***<br>(0.000404)  | -0.00895***<br>(0.000665) | -0.0284***<br>(0.000985) | -0.00179***<br>(0.000101)  | -0.0208***<br>(0.00114)  | -0.00695***<br>(0.000786)  | -0.0138***<br>(0.00219)   | 0.00162*<br>(0.000880)   |  |
| Share < 16                 | 0.0176***<br>(0.00564)    | -0.0264***<br>(0.00937)  | 0.00189<br>(0.00212)       | -0.00293<br>(0.00245)      | -0.00904*<br>(0.00468)    | 0.000631<br>(0.00721)    | 0.00565***<br>(0.000500)   | 0.166***<br>(0.00987)    | 0.0182***<br>(0.00377)     | -0.0110<br>(0.0144)       | 0.00255<br>(0.00633)     |  |
| House Ownership (Yes = 1)  | 0.0243***<br>(0.00211)    | -0.000467<br>(0.00364)   | 0.00856***<br>(0.00097)    | 0.0183***<br>(0.00157)     | 0.0399***<br>(0.00465)    | 0.0913***<br>(0.00396)   | 0.00323***<br>(0.000227)   | 0.127***<br>(0.00559)    | 0.0186***<br>(0.00251)     | 0.0328***<br>(0.00718)    | 0.0403***<br>(0.00342)   |  |
| Education Head (Primary)   | 0.0321***<br>(0.00261)    | 0.0668***<br>(0.00487)   | 0.00788***<br>(0.00127)    | 0.0162***<br>(0.00126)     | 0.0449***<br>(0.00289)    | 0.0629***<br>(0.00250)   | -0.000503**<br>(0.000254)  | 0.0584***<br>(0.00315)   | 0.0114***<br>(0.00131)     | 0.0932***<br>(0.00746)    | 0.0596***<br>(0.00403)   |  |
| Education Head (Secondary) | 0.0750***<br>(0.00309)    | 0.0796***<br>(0.00498)   | 0.0117***<br>(0.00126)     | 0.0313***<br>(0.00205)     | 0.0662***<br>(0.00358)    | 0.151***<br>(0.00496)    | 0.00572***<br>(0.000354)   | 0.183***<br>(0.00387)    | 0.0209***<br>(0.00257)     | 0.112***<br>(0.00837)     | 0.0856***<br>(0.00437)   |  |
| Education Head (Above)     | 0.133***<br>(0.00479)     | 0.0228***<br>(0.00671)   | 0.0117***<br>(0.00175)     | 0.0527***<br>(0.00355)     | 0.0669***<br>(0.00455)    | 0.226***<br>(0.00569)    | 0.0180***<br>(0.000857)    | 0.168***<br>(0.00709)    | 0.0468***<br>(0.00481)     | 0.148***<br>(0.0102)      | 0.106***<br>(0.00470)    |  |
| Age Head                   | 0.000747***<br>(0.00007)  | -0.000189<br>(0.00012)   | 0.000184***<br>(0.00003)   | 0.000584***<br>(5.20e-05)  | 0.000706***<br>(9.30e-05) | 0.00346***<br>(0.000149) | 0.000101***<br>(9.09e-06)  | 0.00370***<br>(0.000205) | 0.000351***<br>(8.90e-05)  | 0.00248***<br>(0.000252)  | 0.00297***<br>(0.000113) |  |
| Gender Head (Female = 1)   | -0.0130***<br>(0.00194)   | 0.00487<br>(0.00328)     | 0.00275***<br>(0.00077)    | 0.0141***<br>(0.00213)     | 0.0169***<br>(0.00251)    | 0.0784***<br>(0.00566)   | 0.000267<br>(0.000214)     | -0.00413<br>(0.00383)    | -0.00133<br>(0.00120)      | -0.00209<br>(0.00628)     | 0.0148***<br>(0.00220)   |  |
| House Quality (Medium)     | 0.0567***<br>(0.01128)    | 0.285***<br>(0.03591)    | 0.0377***<br>(0.00922)     |                            |                           |                          | 0.00267***<br>(0.000604)   | 0.108***<br>(0.00766)    | 0.00779***<br>(0.00245)    | 0.00528<br>(0.0284)       | 0.0696***<br>(0.0153)    |  |
| House Quality (High)       | 0.0661***<br>(0.01087)    | 0.302***<br>(0.03557)    | 0.0461***<br>(0.00921)     |                            |                           |                          | 0.00900***<br>(0.000682)   | 0.380***<br>(0.00887)    | 0.0361***<br>(0.00291)     | 0.0818***<br>(0.0340)     | 0.133***<br>(0.0162)     |  |
| Observations               | 75,290                    | 75,290                   | 75,290                     | 167,648                    | 170,470                   | 166,402                  | 524,112                    | 524,112                  | 78,607                     | 78,607                    | 78,607                   |  |

Clustered standard errors at district level for MEX, IDN and IND, and robust standard errors for Brazil in parentheses

State fixed effects for India, Indonesia and Brazil. Region fixed effects for Brazil

\*\*\* p<0.01, \*\* p<0.05, \* p<0.1

We have also included (but not above-reported) occupation of the household head in MEX and IND regressions

Supplementary Table 6: Logit models with state fixed effects using CDD wet-bulbs. Total Marginal Effects

| Variables                  | Brazil                   |                          |                            | India                     |                           |                           | Indonesia                 |                           |                           | Mexico                   |                           |  |
|----------------------------|--------------------------|--------------------------|----------------------------|---------------------------|---------------------------|---------------------------|---------------------------|---------------------------|---------------------------|--------------------------|---------------------------|--|
|                            | AC<br>(1)                | FAN<br>(2)               | REF<br>(3)                 | AC<br>(4)                 | FAN<br>(5)                | REF<br>(6)                | AC<br>(7)                 | REF<br>(8)                | AC<br>(9)                 | FAN<br>(10)              | REF<br>(11)               |  |
| Mean CDD wet-bulb          | 0.000245***<br>(0.00001) | 0.000381***<br>(0.00002) | -1.27e-05***<br>(2.41e-06) | 9.31e-05***<br>(3.19e-05) | 0.000340***<br>(4.22e-05) | 0.000168***<br>(3.67e-05) | 1.14e-05***<br>(1.30e-06) | 0.000225***<br>(2.30e-05) | 0.000135***<br>(2.37e-05) | 0.00143***<br>(7.35e-05) | 8.05e-05***<br>(1.70e-05) |  |
| Total Expenditure (Log)    | 0.105***<br>(0.00167)    | 0.100***<br>(0.00245)    | 0.0188***<br>(0.00060)     | 0.0713***<br>(0.00374)    | 0.134***<br>(0.00438)     | 0.356***<br>(0.00745)     | 0.0173***<br>(0.000650)   | 0.429***<br>(0.00465)     | 0.0379***<br>(0.00329)    | 0.142***<br>(0.00709)    | 0.0726***<br>(0.00299)    |  |
| Urban (Yes = 1)            |                          |                          |                            | 0.0320***<br>(0.00294)    | 0.0586***<br>(0.00361)    | 0.129***<br>(0.00485)     | 0.0142***<br>(0.000700)   | 0.177***<br>(0.00640)     | 0.0205***<br>(0.00470)    | 0.0794***<br>(0.0116)    | 0.0257***<br>(0.00383)    |  |
| HH size                    | -0.0131***<br>(0.00080)  | -0.00573***<br>(0.00127) | 8.91e-05<br>(0.00033)      | -0.00459***<br>(0.000406) | -0.00891***<br>(0.000663) | -0.0284***<br>(0.000986)  | -0.00175***<br>(9.75e-05) | -0.0208***<br>(0.00114)   | -0.00703***<br>(0.000797) | -0.0138***<br>(0.00219)  | 0.00161*<br>(0.000880)    |  |
| Share < 16                 | 0.0178***<br>(0.00570)   | -0.0264***<br>(0.00938)  | 0.00192<br>(0.00215)       | -0.00295<br>(0.00247)     | -0.00900*<br>(0.00467)    | 0.000631<br>(0.00721)     | 0.00553***<br>(0.000487)  | 0.166***<br>(0.00987)     | 0.0184***<br>(0.00382)    | -0.0110<br>(0.0144)      | 0.00255<br>(0.00632)      |  |
| House Ownership (Yes = 1)  | 0.0246***<br>(0.00214)   | -0.000467<br>(0.00364)   | 0.00867***<br>(0.00098)    | 0.0184***<br>(0.00158)    | 0.0397***<br>(0.00464)    | 0.0913***<br>(0.00396)    | 0.00317***<br>(0.000222)  | 0.127***<br>(0.00558)     | 0.0188***<br>(0.00257)    | 0.0327***<br>(0.00718)   | 0.0403***<br>(0.00342)    |  |
| Education Head (Primary)   | 0.0324***<br>(0.00264)   | 0.0669***<br>(0.00488)   | 0.00799***<br>(0.00128)    | 0.0163***<br>(0.00127)    | 0.0447***<br>(0.00289)    | 0.0629***<br>(0.00250)    | -0.000493**<br>(0.000249) | 0.0584***<br>(0.00315)    | 0.0115***<br>(0.00134)    | 0.0932***<br>(0.00746)   | 0.0596***<br>(0.00404)    |  |
| Education Head (Secondary) | 0.0758***<br>(0.00313)   | 0.0796***<br>(0.00499)   | 0.0118***<br>(0.00127)     | 0.0315***<br>(0.00206)    | 0.0659***<br>(0.00358)    | 0.151***<br>(0.00495)     | 0.00560***<br>(0.000345)  | 0.183***<br>(0.00387)     | 0.0212***<br>(0.00263)    | 0.112***<br>(0.00837)    | 0.0855***<br>(0.00437)    |  |
| Education Head (Above)     | 0.134***<br>(0.00485)    | 0.0228***<br>(0.00671)   | 0.0119***<br>(0.00178)     | 0.0530***<br>(0.00357)    | 0.0667***<br>(0.00455)    | 0.226***<br>(0.00568)     | 0.0176***<br>(0.000834)   | 0.167***<br>(0.00709)     | 0.0473***<br>(0.00487)    | 0.148***<br>(0.0102)     | 0.105***<br>(0.00471)     |  |
| Age Head                   | 0.000755***<br>(0.00007) | -0.000189<br>(0.00012)   | 0.000186***<br>(0.00003)   | 0.000588***<br>(5.24e-05) | 0.000703***<br>(9.27e-05) | 0.00346***<br>(0.000149)  | 9.91e-05***<br>(8.85e-06) | 0.00370***<br>(0.000205)  | 0.000355***<br>(9.03e-05) | 0.00248***<br>(0.000251) | 0.00297***<br>(0.000113)  |  |
| Gender Head (Female = 1)   | -0.0131***<br>(0.00197)  | 0.00487<br>(0.00328)     | 0.00279***<br>(0.00078)    | 0.0142***<br>(0.00214)    | 0.0169***<br>(0.00251)    | 0.0784***<br>(0.00566)    | 0.000261<br>(0.000210)    | -0.00413<br>(0.00383)     | -0.00135<br>(0.00122)     | -0.00209<br>(0.00628)    | 0.0148***<br>(0.00220)    |  |
| House Quality (Medium)     | 0.0573***<br>(0.01142)   | 0.285***<br>(0.03592)    | 0.0381***<br>(0.00934)     |                           |                           |                           | 0.00262***<br>(0.000591)  | 0.108***<br>(0.00765)     | 0.00789***<br>(0.00248)   | 0.00528<br>(0.0284)      | 0.0695***<br>(0.0153)     |  |
| House Quality (High)       | 0.0669***<br>(0.01101)   | 0.302***<br>(0.03557)    | 0.0467***<br>(0.00932)     |                           |                           |                           | 0.00881***<br>(0.000668)  | 0.380***<br>(0.00887)     | 0.0365***<br>(0.00293)    | 0.0818**<br>(0.0340)     | 0.133***<br>(0.0162)      |  |
| Observations               | 75,290                   | 75,290                   | 75,290                     | 167,648                   | 170,470                   | 166,402                   | 524,112                   | 524,112                   | 78,607                    | 78,607                   | 78,607                    |  |

Clustered standard errors at district level for MEX, IND and Indonesia, and robust standard errors for Brazil in parentheses

State fixed effects for India, Indonesia and Brazil. Region fixed effects for Brazil

\*\*\* p<0.01, \*\* p<0.05, \* p<0.1

We have also included (but not above-reported) occupation of the household head in MEX and IND regressions



Supplementary Table 7: Standardised logit models with state fixed effects using CDD wet-bulbs. Marginal Effects

| Variables                    | Brazil                  |                          |                          | India                    |                         |                         | Indonesia                 |                         |                          | Mexico                  |                        |  |
|------------------------------|-------------------------|--------------------------|--------------------------|--------------------------|-------------------------|-------------------------|---------------------------|-------------------------|--------------------------|-------------------------|------------------------|--|
|                              | AC<br>(1)               | FAN<br>(2)               | REF<br>(3)               | AC<br>(4)                | FAN<br>(5)              | REF<br>(6)              | AC<br>(7)                 | REF<br>(8)              | AC<br>(9)                | FAN<br>(10)             | REF<br>(11)            |  |
| Std. Mean CDD wet-bulb       | 0.0558***<br>(0.00152)  | 0.0880***<br>(0.00362)   | -0.00290***<br>(0.00055) | 0.0171***<br>(0.00585)   | 0.0633***<br>(0.00790)  | 0.0311***<br>(0.00677)  | 0.00381***<br>(0.000434)  | 0.0735***<br>(0.00750)  | 0.0228***<br>(0.00399)   | 0.244***<br>(0.0126)    | 0.0138***<br>(0.00292) |  |
| Std. Total Expenditure (Log) | 0.0918***<br>(0.00145)  | 0.0888***<br>(0.00218)   | 0.0165***<br>(0.00053)   | 0.0492***<br>(0.00258)   | 0.0933***<br>(0.00303)  | 0.247***<br>(0.00516)   | 0.0126***<br>(0.000475)   | 0.307***<br>(0.00331)   | 0.0315***<br>(0.00272)   | 0.119***<br>(0.00596)   | 0.0610***<br>(0.00251) |  |
| Std. CDD wb x Log Exp        | 0.0112***<br>(0.00121)  | -0.00159<br>(0.00285)    | -0.00268***<br>(0.00041) | 0.00712***<br>(0.00136)  | 0.0102***<br>(0.00292)  | -1.74e-06<br>(0.00301)  | 0.000992***<br>(0.000179) | 0.00459<br>(0.00286)    | 0.0118***<br>(0.00366)   | 0.00793<br>(0.00706)    | 0.00113<br>(0.00148)   |  |
| Urban (Yes = 1)              |                         |                          |                          |                          |                         |                         |                           |                         |                          |                         |                        |  |
| Std. HH size                 | -0.0209***<br>(0.00127) | -0.00924***<br>(0.00205) | 0.000142<br>(0.00053)    | -0.0108***<br>(0.000958) | -0.0212***<br>(0.00158) | -0.0674***<br>(0.00233) | -0.00305***<br>(0.000172) | -0.0354***<br>(0.00194) | -0.0129***<br>(0.00145)  | -0.0256***<br>(0.00404) | 0.00299*<br>(0.00163)  |  |
| Share < 16                   | 0.00389***<br>(0.00125) | -0.00583***<br>(0.00207) | 0.000419<br>(0.00047)    | -0.000674<br>(0.000564)  | -0.00208*<br>(0.00108)  | 0.000145<br>(0.00166)   | 0.00123***<br>(0.000109)  | 0.0361***<br>(0.00214)  | 0.00424***<br>(0.000880) | -0.00256<br>(0.00336)   | 0.000594<br>(0.00148)  |  |
| House Ownership (Yes = 1)    | 0.0243***<br>(0.00211)  | -0.000467<br>(0.00364)   | 0.00856***<br>(0.00097)  | 0.0183***<br>(0.00157)   | 0.0399***<br>(0.00465)  | 0.0913***<br>(0.00396)  | 0.00323***<br>(0.000227)  | 0.127***<br>(0.00559)   | 0.0186***<br>(0.00251)   | 0.0328***<br>(0.00718)  | 0.0403***<br>(0.00342) |  |
| Education Head (Primary)     | 0.0321***<br>(0.00261)  | 0.0668***<br>(0.00487)   | 0.00788***<br>(0.00127)  | 0.0162***<br>(0.00126)   | 0.0449***<br>(0.00289)  | 0.0629***<br>(0.00250)  | -0.000503**<br>(0.000254) | 0.0584***<br>(0.00315)  | 0.0114***<br>(0.00131)   | 0.0932***<br>(0.00746)  | 0.0596***<br>(0.00403) |  |
| Education Head (Secondary)   | 0.0750***<br>(0.00309)  | 0.0796***<br>(0.00498)   | 0.0117***<br>(0.00126)   | 0.0313***<br>(0.00205)   | 0.0662***<br>(0.00358)  | 0.151***<br>(0.00496)   | 0.00572***<br>(0.000354)  | 0.183***<br>(0.00387)   | 0.0209***<br>(0.00257)   | 0.112***<br>(0.00837)   | 0.0856***<br>(0.00437) |  |
| Education Head (Above)       | 0.133***<br>(0.00479)   | 0.0228***<br>(0.00671)   | 0.0117***<br>(0.00175)   | 0.0527***<br>(0.00355)   | 0.0669***<br>(0.00455)  | 0.226***<br>(0.00569)   | 0.0180***<br>(0.000857)   | 0.168***<br>(0.00709)   | 0.0468***<br>(0.00481)   | 0.148***<br>(0.0102)    | 0.106***<br>(0.00470)  |  |
| Std. Age Head                | 0.0119***<br>(0.00117)  | -0.00301<br>(0.00193)    | 0.00292***<br>(0.00047)  | 0.00793***<br>(0.000706) | 0.00958***<br>(0.00126) | 0.0469***<br>(0.00202)  | 0.00137***<br>(0.000123)  | 0.0502***<br>(0.00278)  | 0.00562***<br>(0.00142)  | 0.0397***<br>(0.00403)  | 0.0476***<br>(0.00181) |  |
| Gender Head (Female = 1)     | -0.0130***<br>(0.00194) | 0.00487<br>(0.00328)     | 0.00275***<br>(0.00077)  | 0.0141***<br>(0.00213)   | 0.0169***<br>(0.00251)  | 0.0784***<br>(0.00566)  | 0.000267<br>(0.000214)    | -0.00413<br>(0.00383)   | -0.00133<br>(0.00120)    | -0.00209<br>(0.00628)   | 0.0148***<br>(0.00220) |  |
| House Quality (Medium)       | 0.0567***<br>(0.01128)  | 0.285***<br>(0.03591)    | 0.0377***<br>(0.00922)   |                          |                         |                         | 0.00267***<br>(0.000604)  | 0.108***<br>(0.00766)   | 0.00779***<br>(0.00245)  | 0.00528<br>(0.0284)     | 0.0696***<br>(0.0153)  |  |
| House Quality (High)         | 0.0661***<br>(0.01087)  | 0.302***<br>(0.03557)    | 0.0461***<br>(0.00921)   |                          |                         |                         | 0.00900***<br>(0.000682)  | 0.380***<br>(0.00887)   | 0.0361***<br>(0.00291)   | 0.0818**<br>(0.0340)    | 0.133***<br>(0.0162)   |  |
| Observations                 | 75,290                  | 75,290                   | 75,290                   | 167,648                  | 170,470                 | 166,402                 | 524,112                   | 524,112                 | 78,607                   | 78,607                  | 78,607                 |  |

Clustered standard errors at district level for MEX, IDN and IND, and robust standard errors for Brazil in parentheses

State fixed effects for India, Indonesia and Brazil. Region fixed effects for Brazil

\*\*\* p<0.01, \*\* p<0.05, \* p<0.1

We have also included (but not above-reported) occupation of the household head in MEX and IND regressions

Supplementary Table 8: Logit models with state fixed effects using dry-bulb CDDs. Marginal effects

| Variables                  | Brazil                     |                          |                            | India                      |                            |                          | Indonesia                  |                            |                           | Mexico                     |                          |  |
|----------------------------|----------------------------|--------------------------|----------------------------|----------------------------|----------------------------|--------------------------|----------------------------|----------------------------|---------------------------|----------------------------|--------------------------|--|
|                            | AC<br>(1)                  | FAN<br>(2)               | REF<br>(3)                 | AC<br>(4)                  | FAN<br>(5)                 | REF<br>(6)               | AC<br>(7)                  | REF<br>(8)                 | AC<br>(9)                 | FAN<br>(10)                | REF<br>(11)              |  |
| Mean CDD dry-bulb          | -0.000277***<br>(0.000003) | -0.0000410<br>(0.000006) | 0.0000345***<br>(0.000001) | -0.000105***<br>(3.73e-05) | -0.000268***<br>(5.96e-05) | 7.29e-06<br>(8.49e-05)   | -2.61e-05***<br>(5.28e-06) | -0.000265***<br>(7.95e-05) | 5.97e-07<br>(2.94e-05)    | 0.00128***<br>(0.000140)   | 7.19e-05*<br>(3.97e-05)  |  |
| Total Expenditure (Log)    | 0.0794***<br>(0.00201)     | 0.0858***<br>(0.00337)   | 0.0206***<br>(0.00093)     | 0.0396***<br>(0.00561)     | 0.0790***<br>(0.00938)     | 0.347***<br>(0.0130)     | 0.0150***<br>(0.000636)    | 0.401***<br>(0.00807)      | 0.0260***<br>(0.00274)    | 0.168***<br>(0.00780)      | 0.0731***<br>(0.00311)   |  |
| CDD db x Log Exp           | 4.45e-05***<br>(3.13e-06)  | 4.07e-05***<br>(0.00001) | -3.46e-06**<br>(1.39e-06)  | 2.42e-05***<br>(4.29e-06)  | 5.10e-05***<br>(7.79e-06)  | 8.98e-06<br>(1.02e-05)   | 3.86e-06***<br>(5.85e-07)  | 4.61e-05***<br>(9.12e-06)  | 1.42e-05***<br>(2.87e-06) | -8.07e-05***<br>(2.01e-05) | -2.42e-06<br>(4.30e-06)  |  |
| Urban (Yes = 1)            |                            |                          |                            | 0.0310***<br>(0.00243)     | 0.0548***<br>(0.00365)     | 0.129***<br>(0.00486)    | 0.0142***<br>(0.000670)    | 0.177***<br>(0.00643)      | 0.0168***<br>(0.00274)    | 0.0733***<br>(0.0110)      | 0.0253***<br>(0.00374)   |  |
| HH size                    |                            |                          |                            | -0.00449***<br>(0.000337)  | -0.00884***<br>(0.000637)  | -0.0286***<br>(0.000986) | -0.00182***<br>(9.95e-05)  | -0.0211***<br>(0.00115)    | -0.00586***<br>(0.000620) | -0.0143***<br>(0.00203)    | 0.00167*<br>(0.000877)   |  |
| Share < 16                 |                            |                          |                            | 0.0176***<br>(0.00549)     | -0.0210**<br>(0.00932)     | 0.00220<br>(0.00217)     | -0.00229<br>(0.00219)      | 0.168***<br>(0.00982)      | 0.0147***<br>(0.00279)    | -0.00327<br>(0.0141)       | 0.00253<br>(0.00630)     |  |
| House Ownership (Yes = 1)  |                            |                          |                            | 0.0242***<br>(0.00205)     | -0.00162<br>(0.00361)      | 0.00848***<br>(0.00099)  | 0.0173***<br>(0.00142)     | 0.128***<br>(0.00563)      | 0.0142***<br>(0.00138)    | 0.0308***<br>(0.00687)     | 0.0401***<br>(0.00337)   |  |
| Education Head (Primary)   |                            |                          |                            | 0.0310***<br>(0.00251)     | 0.0660***<br>(0.00486)     | 0.00795***<br>(0.00128)  | 0.0156***<br>(0.00107)     | 0.0585***<br>(0.00313)     | 0.00906***<br>(0.00110)   | 0.0915***<br>(0.00774)     | 0.0595***<br>(0.00405)   |  |
| Education Head (Secondary) |                            |                          |                            | 0.0752***<br>(0.00301)     | 0.0797***<br>(0.00496)     | 0.0116***<br>(0.00127)   | 0.0306***<br>(0.00192)     | 0.183***<br>(0.00380)      | 0.0157***<br>(0.00156)    | 0.108***<br>(0.00874)      | 0.0853***<br>(0.00434)   |  |
| Education Head (Above)     |                            |                          |                            | 0.131***<br>(0.00470)      | 0.0253***<br>(0.00670)     | 0.0115***<br>(0.00178)   | 0.0516***<br>(0.00284)     | 0.167***<br>(0.00713)      | 0.0428***<br>(0.00380)    | 0.143***<br>(0.0102)       | 0.105***<br>(0.00464)    |  |
| Age Head                   |                            |                          |                            | 0.000725***<br>(0.00007)   | -0.000165<br>(0.00012)     | 0.000188***<br>(0.00003) | 0.000576***<br>(4.53e-05)  | 0.00369***<br>(0.000205)   | 0.000287***<br>(4.75e-05) | 0.00240***<br>(0.000248)   | 0.00296***<br>(0.000111) |  |
| Gender Head                |                            |                          |                            | -0.0128***<br>(0.00189)    | 0.00431<br>(0.00326)       | 0.00274***<br>(0.00078)  | 0.0146***<br>(0.00200)     | -0.00464<br>(0.00386)      | -0.000300<br>(0.000973)   | -0.00144<br>(0.00639)      | 0.0148***<br>(0.00219)   |  |
| House Quality (Medium)     |                            |                          |                            | 0.0539***<br>(0.01052)     | 0.286***<br>(0.03704)      | 0.0412***<br>(0.00979)   |                            | 0.110***<br>(0.00751)      | 0.00524***<br>(0.00176)   | 0.0226<br>(0.0256)         | 0.0694***<br>(0.0153)    |  |
| House Quality (High)       |                            |                          |                            | 0.0637***<br>(0.01012)     | 0.301***<br>(0.03670)      | 0.0498***<br>(0.00978)   |                            | 0.381***<br>(0.00863)      | 0.0259***<br>(0.00332)    | 0.0934***<br>(0.0304)      | 0.133***<br>(0.0162)     |  |
| Observations               | 75,290                     | 75,290                   | 75,290                     | 167,648                    | 170,470                    | 166,402                  | 525,918                    | 525,918                    | 78,607                    | 78,607                     | 78,607                   |  |

Clustered standard errors at district level for MEX, IND, and INE, and robust standard errors for Brazil in parentheses

State fixed effects for India, Indonesia and Brazil. Region fixed effects for Brazil

\*\*\* p<0.01, \*\* p<0.05, \* p<0.1

We have also included (but not above-reported) occupation of the household head in MEX and IND regressions

Supplementary Table 9: OLS regression models for electricity quantity with state fixed effects using wet-bulb CDDs.

| Variables                  | Brazil                    | India                    | Indonesia                 | Mexico                    |
|----------------------------|---------------------------|--------------------------|---------------------------|---------------------------|
|                            | (1)                       | (2)                      | (3)                       | (4)                       |
| Mean CDD wet-bulb          | -0.00220***<br>(0.000181) | -4.24e-05<br>(0.000480)  | -0.000549**<br>(0.000275) | -0.00240***<br>(0.000326) |
| Total Expenditure (Log)    | 0.270***<br>(0.00520)     | 0.582***<br>(0.0211)     | 0.490***<br>(0.0107)      | 0.262***<br>(0.00819)     |
| CDD wb x Log Exp           | 0.000246***<br>(1.88e-05) | 3.26e-05<br>(5.62e-05)   | 9.42e-05***<br>(2.86e-05) | 0.000328***<br>(3.72e-05) |
| Urban (Yes = 1)            |                           | 0.286***<br>(0.0115)     | 0.266***<br>(0.0119)      | 0.123***<br>(0.0140)      |
| HH size                    | 0.0891***<br>(0.00273)    | -0.00953***<br>(0.00217) | 0.00527***<br>(0.00189)   | 0.0465***<br>(0.00219)    |
| Share < 16                 | -0.0735***<br>(0.0182)    | 0.00286<br>(0.0143)      | 0.126***<br>(0.0134)      | -0.0441***<br>(0.0152)    |
| House Ownership (Yes = 1)  | 0.0421***<br>(0.00681)    | 0.237***<br>(0.0103)     | 0.119***<br>(0.00954)     | 0.0710***<br>(0.00845)    |
| Education Head (Primary)   | 0.114***<br>(0.0124)      | 0.0724***<br>(0.00620)   | 0.0276***<br>(0.00627)    | 0.0824***<br>(0.00748)    |
| Education Head (Secondary) | 0.190***<br>(0.0132)      | 0.136***<br>(0.00813)    | 0.104***<br>(0.00733)     | 0.114***<br>(0.00820)     |
| Education Head (Above)     | 0.261***<br>(0.0151)      | 0.199***<br>(0.00938)    | 0.135***<br>(0.0115)      | 0.160***<br>(0.0106)      |
| Age Head                   | 0.00331***<br>(0.00023)   | 0.00541***<br>(0.000276) | 0.00541***<br>(0.000296)  | 0.00560***<br>(0.000261)  |
| Gender Head (Female = 1)   | -0.00117<br>(0.00593)     | 0.0695***<br>(0.00770)   | -0.0130**<br>(0.00546)    | 0.0180***<br>(0.00530)    |
| House Quality (Medium)     | 0.107<br>(0.127)          |                          | 0.180***<br>(0.0264)      | 0.0927***<br>(0.0249)     |
| House Quality (High)       | 0.0993<br>(0.126)         |                          | 0.437***<br>(0.0301)      | 0.224***<br>(0.0281)      |
| Observations               | 34,459                    | 85,371                   | 268,310                   | 61,421                    |
| R-squared                  | 0.325                     | 0.523                    | 0.395                     | 0.503                     |

Clustered standard errors at district level for MEX, IDN and IND, and robust standard errors for Brazil in parentheses

State fixed effects for India, Indonesia and Brazil. Region fixed effects for Brazil

\*\*\* p<0.01, \*\* p<0.05, \* p<0.1

We have also included (but not above-reported) occupation of the household head in MEX and IND regressions

Supplementary Table 10: OLS regression models for electricity quantity with state fixed effects using dry-bulb CDDs.

| Variables                  | Brazil                    | India                      | Indonesia                 | Mexico                    |
|----------------------------|---------------------------|----------------------------|---------------------------|---------------------------|
|                            | (1)                       | (2)                        | (3)                       | (4)                       |
| Mean CDD dry-bulb          | -0.00108***<br>(8.74e-05) | -0.000600***<br>(0.000198) | -0.000459**<br>(0.000188) | -0.00121***<br>(0.000106) |
| Total Expenditure (Log)    | 0.254***<br>(0.00584)     | 0.498***<br>(0.0301)       | 0.469***<br>(0.0138)      | 0.228***<br>(0.00682)     |
| CDD wb x Log Exp           | 0.000127***<br>(9.06e-06) | 8.72e-05***<br>(2.35e-05)  | 7.47e-05***<br>(2.07e-05) | 0.000188***<br>(1.20e-05) |
| Urban (Yes = 1)            |                           | 0.285***<br>(0.0117)       | 0.263***<br>(0.0116)      | 0.121***<br>(0.0114)      |
| HH size                    | 0.0883***<br>(0.00272)    | -0.00955***<br>(0.00214)   | 0.00545***<br>(0.00186)   | 0.0470***<br>(0.00213)    |
| Share < 16                 | -0.0690***<br>(0.0182)    | 0.00365<br>(0.0141)        | 0.128***<br>(0.0133)      | -0.0475***<br>(0.0147)    |
| House Ownership (Yes = 1)  | 0.0424***<br>(0.00680)    | 0.237***<br>(0.0102)       | 0.120***<br>(0.00955)     | 0.0670***<br>(0.00743)    |
| Education Head (Primary)   | 0.109***<br>(0.0125)      | 0.0724***<br>(0.00617)     | 0.0279***<br>(0.00614)    | 0.0862***<br>(0.00710)    |
| Education Head (Secondary) | 0.185***<br>(0.0133)      | 0.136***<br>(0.00812)      | 0.103***<br>(0.00724)     | 0.115***<br>(0.00756)     |
| Education Head (Above)     | 0.258***<br>(0.0151)      | 0.199***<br>(0.00945)      | 0.134***<br>(0.0115)      | 0.167***<br>(0.00974)     |
| Age Head                   | 0.00330***<br>(0.000228)  | 0.00548***<br>(0.000270)   | 0.00540***<br>(0.000296)  | 0.00560***<br>(0.000257)  |
| Gender Head (Female = 1)   | -0.000698<br>(0.00593)    | 0.0707***<br>(0.00768)     | -0.0146***<br>(0.00539)   | 0.0186***<br>(0.00504)    |
| House Quality (Medium)     | 0.117<br>(0.125)          |                            | 0.183***<br>(0.0258)      | 0.0897***<br>(0.0221)     |
| House Quality (High)       | 0.106<br>(0.124)          |                            | 0.441***<br>(0.0293)      | 0.218***<br>(0.0244)      |
| Observations               | 34,459                    | 85,371                     | 269,277                   | 61,421                    |
| R-squared                  | 0.326                     | 0.525                      | 0.398                     | 0.525                     |

Clustered standard errors at district level for MEX, IDN and IND, and robust standard errors for Brazil in parentheses

State fixed effects for India, Indonesia and Brazil. Region fixed effects for Brazil

\*\*\* p<0.01, \*\* p<0.05, \* p<0.1

We have also included (but not above-reported) occupation of the household head in MEX and IND regressions

Supplementary Table 11: Logit models: sensitivity to omitted variables and waves

|               | AC-Brazil                | AC-Brazil                | AC-Brazil                | AC-Mexico                | AC-Mexico                | AC-Mexico                | AC-India                 | AC-India                 | AC-India                  | AC-India                  | AC-Indonesia              | AC-Indonesia              | AC-Indonesia |
|---------------|--------------------------|--------------------------|--------------------------|--------------------------|--------------------------|--------------------------|--------------------------|--------------------------|---------------------------|---------------------------|---------------------------|---------------------------|--------------|
| CDD wb        | 0.000480***<br>(0.00002) | 0.000491***<br>(0.00001) | 0.000245***<br>(0.00001) | 0.000150***<br>(0.00003) | 0.000145***<br>(0.00003) | 0.000135***<br>(0.00002) | 0.000133***<br>(0.00005) | 0.000126***<br>(0.00004) | 0.0000931***<br>(0.00003) | 0.0000303***<br>(0.00000) | 0.0000161***<br>(0.00000) | 0.0000114***<br>(0.00000) |              |
| Log Tot. exp. | 0.220***<br>(0.00314)    | 0.186***<br>(0.00364)    | 0.105***<br>(0.00167)    | 0.05959***<br>(0.00468)  | 0.0395***<br>(0.00348)   | 0.0379***<br>(0.00329)   | 0.134***<br>(0.00545)    | 0.0995***<br>(0.00496)   | 0.0713***<br>(0.00374)    | 0.0485***<br>(0.00202)    | 0.0253***<br>(0.00094)    | 0.0173***<br>(0.00065)    |              |
| Other vars.   | NO                       | YES                      | YES                      | NO                       | YES                      | YES                      | NO                       | YES                      | YES                       | NO                        | YES                       | YES                       |              |
| State FE      | YES                      | YES                      | YES                      | YES                      | YES                      | YES                      | YES                      | YES                      | YES                       | YES                       | YES                       | YES                       |              |
| Year FE       | NO                       | NO                       | YES                      | NO                       | NO                       | YES                      | NO                       | NO                       | YES                       | NO                        | NO                        | YES                       |              |
| Two waves     | NO                       | NO                       | YES                      | NO                       | NO                       | YES                      | NO                       | NO                       | YES                       | NO                        | NO                        | YES                       |              |

Clustered standard errors at district level for MEX, IND, and INDI, and robust standard errors for Brazil in parentheses

State fixed effects for India, Indonesia and Brazil. Region fixed effects for Brazil

\*\*\* p<0.01, \*\* p<0.05, \* p<0.1

We have also included (but not above-reported) occupation of the household head in MEX and IND regressions.

The specifications that do not use the two waves only use the latest wave.

Supplementary Table 12: Marginal elasticity of air-conditioning to CDDs across temperature measurements and temperature thresholds

|               | 24 deg - wb            |                        |                        |                         | 24 deg - db            |                        |                        |                         |
|---------------|------------------------|------------------------|------------------------|-------------------------|------------------------|------------------------|------------------------|-------------------------|
|               | AC-Brazil              | AC-Mexico              | AC-India               | AC-Indonesia            | AC-Brazil              | AC-Mexico              | AC-India               | AC-Indonesia            |
| CDDs          | 0.0565***<br>(0.00154) | 0.0230***<br>(0.00406) | 0.0172***<br>(0.00588) | 0.00373***<br>(0.00042) | 0.0608***<br>(0.00194) | 0.0533***<br>(0.00556) | 0.0444***<br>(0.00440) | 0.00339***<br>(0.00034) |
| Log Tot. exp. | 0.0928***<br>(0.00148) | 0.0319***<br>(0.00276) | 0.0495***<br>(0.00259) | 0.0123***<br>(0.00046)  | 0.0930***<br>(0.00151) | 0.0265***<br>(0.00216) | 0.0456***<br>(0.00247) | 0.0123***<br>(0.00045)  |
|               | 22 deg - wb            |                        |                        |                         | 22 deg - db            |                        |                        |                         |
|               | AC-Brazil              | AC-Mexico              | AC-India               | AC-Indonesia            | AC-Brazil              | AC-Mexico              | AC-India               | AC-Indonesia            |
| CDDs          | 0.0696***<br>(0.00177) | 0.0366***<br>(0.00680) | 0.0158**<br>(0.00636)  | 0.00408***<br>(0.00040) | 0.0774***<br>(0.00222) | 0.0578***<br>(0.00511) | 0.0469***<br>(0.00469) | 0.00350***<br>(0.00032) |
| Log Tot. exp. | 0.0928***<br>(0.00148) | 0.0299***<br>(0.00261) | 0.0493***<br>(0.00262) | 0.0120***<br>(0.00044)  | 0.0935***<br>(0.00149) | 0.0236***<br>(0.00238) | 0.0450***<br>(0.00252) | 0.0120***<br>(0.00042)  |

Clustered standard errors at district level for MEX, IDN and IND, and robust standard errors for Brazil in parentheses

State fixed effects for India, Indonesia and Brazil. Region fixed effects for Brazil

\*\*\* p<0.01, \*\* p<0.05, \* p<0.1

We have also included (but not above-reported) occupation of the household head in MEX and IND regressions.

Supplementary Table 13: Total number of households with at least one AC unit around 2040 under different climate change scenarios (in million)

|                  | Historical | RCP4.5            | RCP8.5            |
|------------------|------------|-------------------|-------------------|
| <b>Brazil</b>    | 10.931     | [29.591-36.197]   | [35.099-40.377]   |
| <b>India</b>     | 28.904     | [142.004-183.668] | [151.822-190.327] |
| <b>Indonesia</b> | 5.498      | [29.597-40.809]   | [31.584-42.564]   |
| <b>Mexico</b>    | 4.795      | [9.924-12.300]    | [10.536-13.012]   |

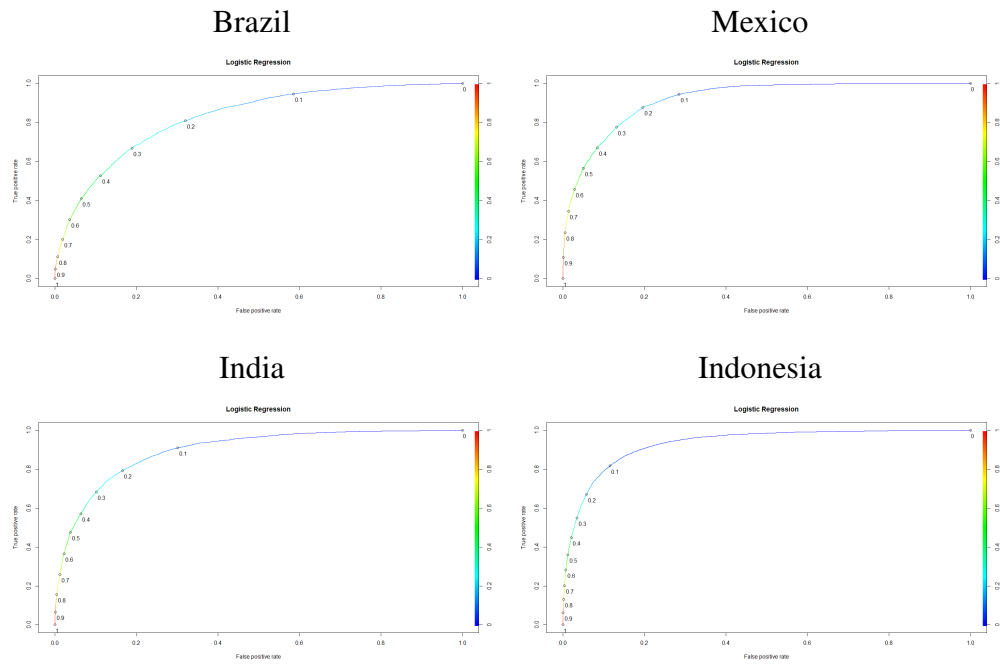

Supplementary Figure 2: Diagnostic of air conditioning logit model performance through the inspection of the Area Under the Receiver Operating Characteristic (ROC) curve.

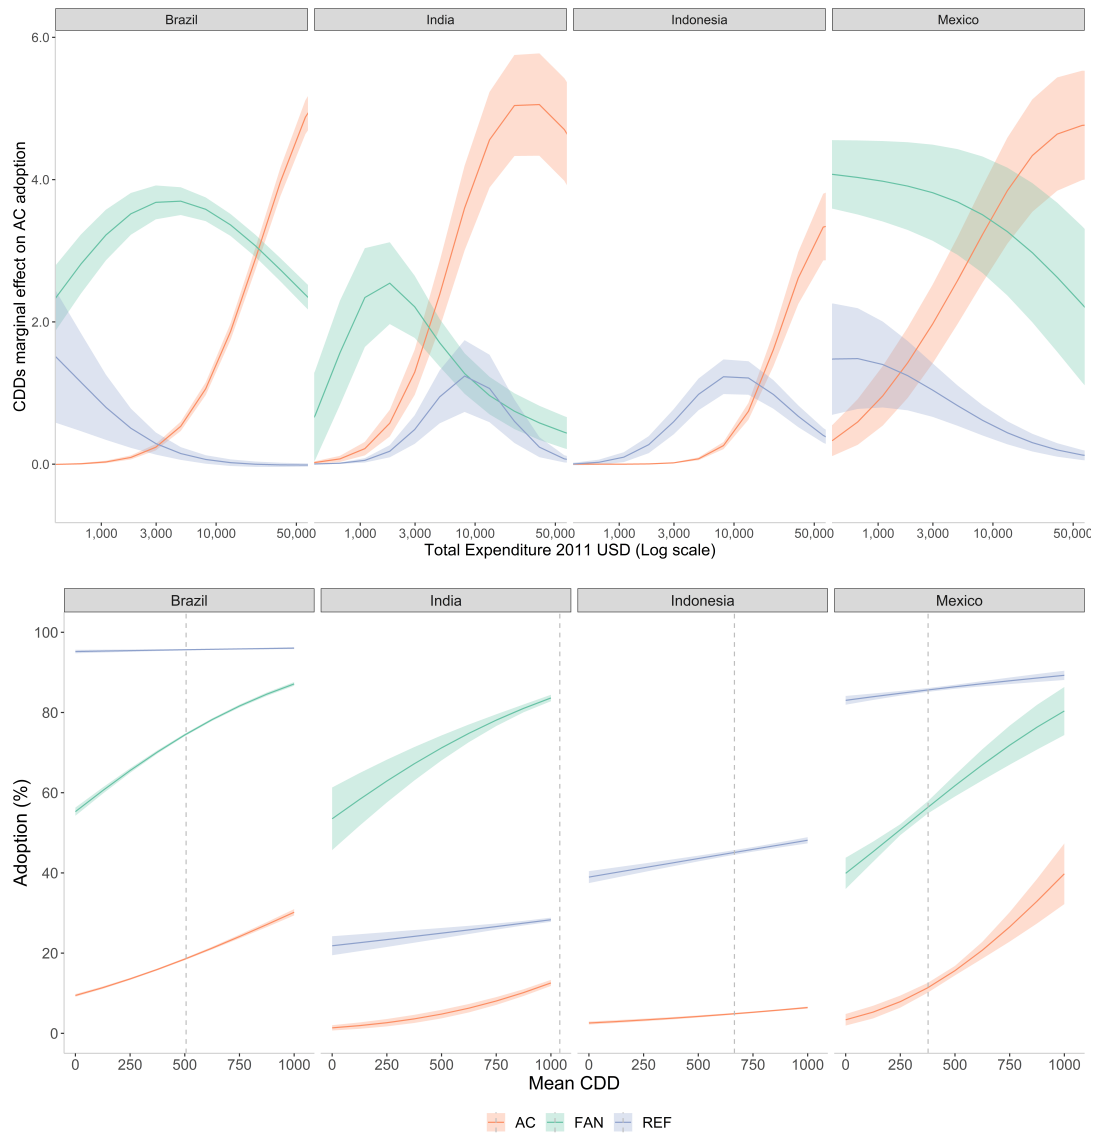

Supplementary Figure 3: Top: Average marginal effect (in percentage points) of dry-bulb CDDs on air conditioner, fan and refrigerator adoption for different levels of total expenditure. Bottom: Predicted adoption rates of air-conditioning and other durable goods used for cooling across different levels of dry-bulb CDDs.



### **3 Projected changes in air-conditioning adoption and electricity use**

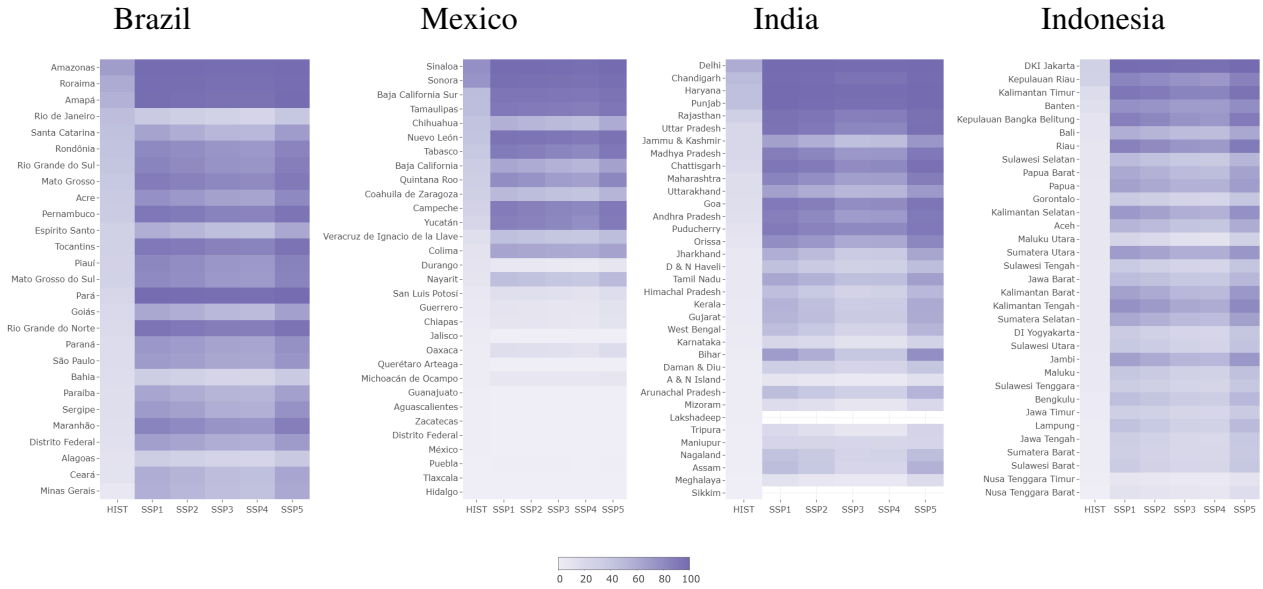

Supplementary Figure 4: Historical and future state-level adoption rates of air conditioners in the year 2040 under RCP4.5

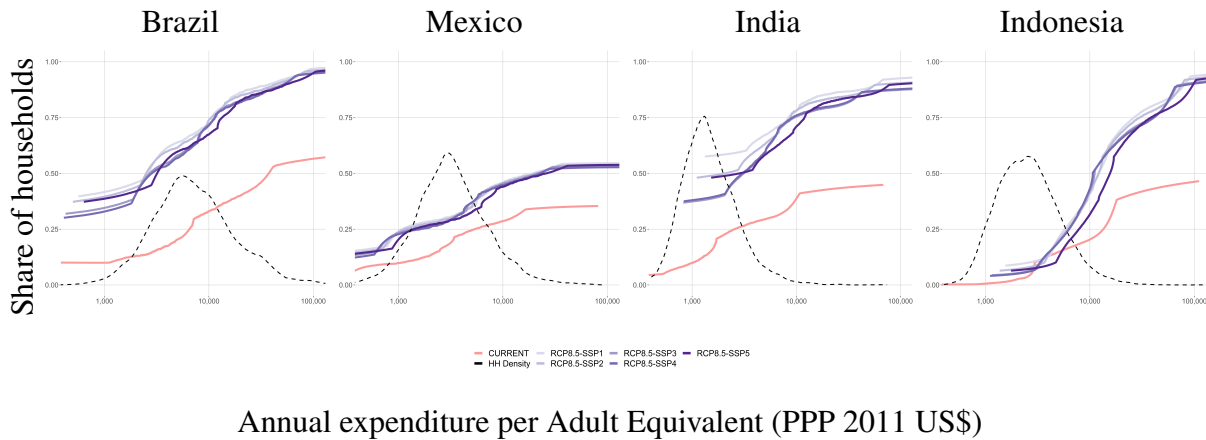

Supplementary Figure 5: Ownership of air conditioners in relation to historical per capita expenditure (2011 US constant dollars at PPP). Adoption scenarios across SSPs

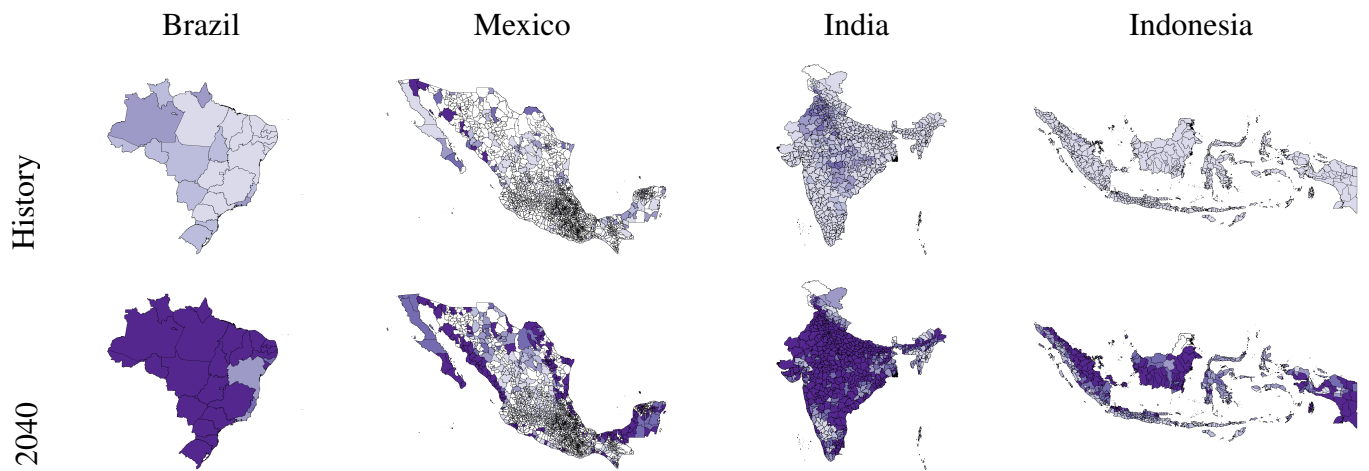

Supplementary Figure 6: Spatial distribution of historical (latest wave) and future (2040, SSP5 RCP 8.5) ownership of AC. Maps are generated using the sp, rgdal, and raster R packages.

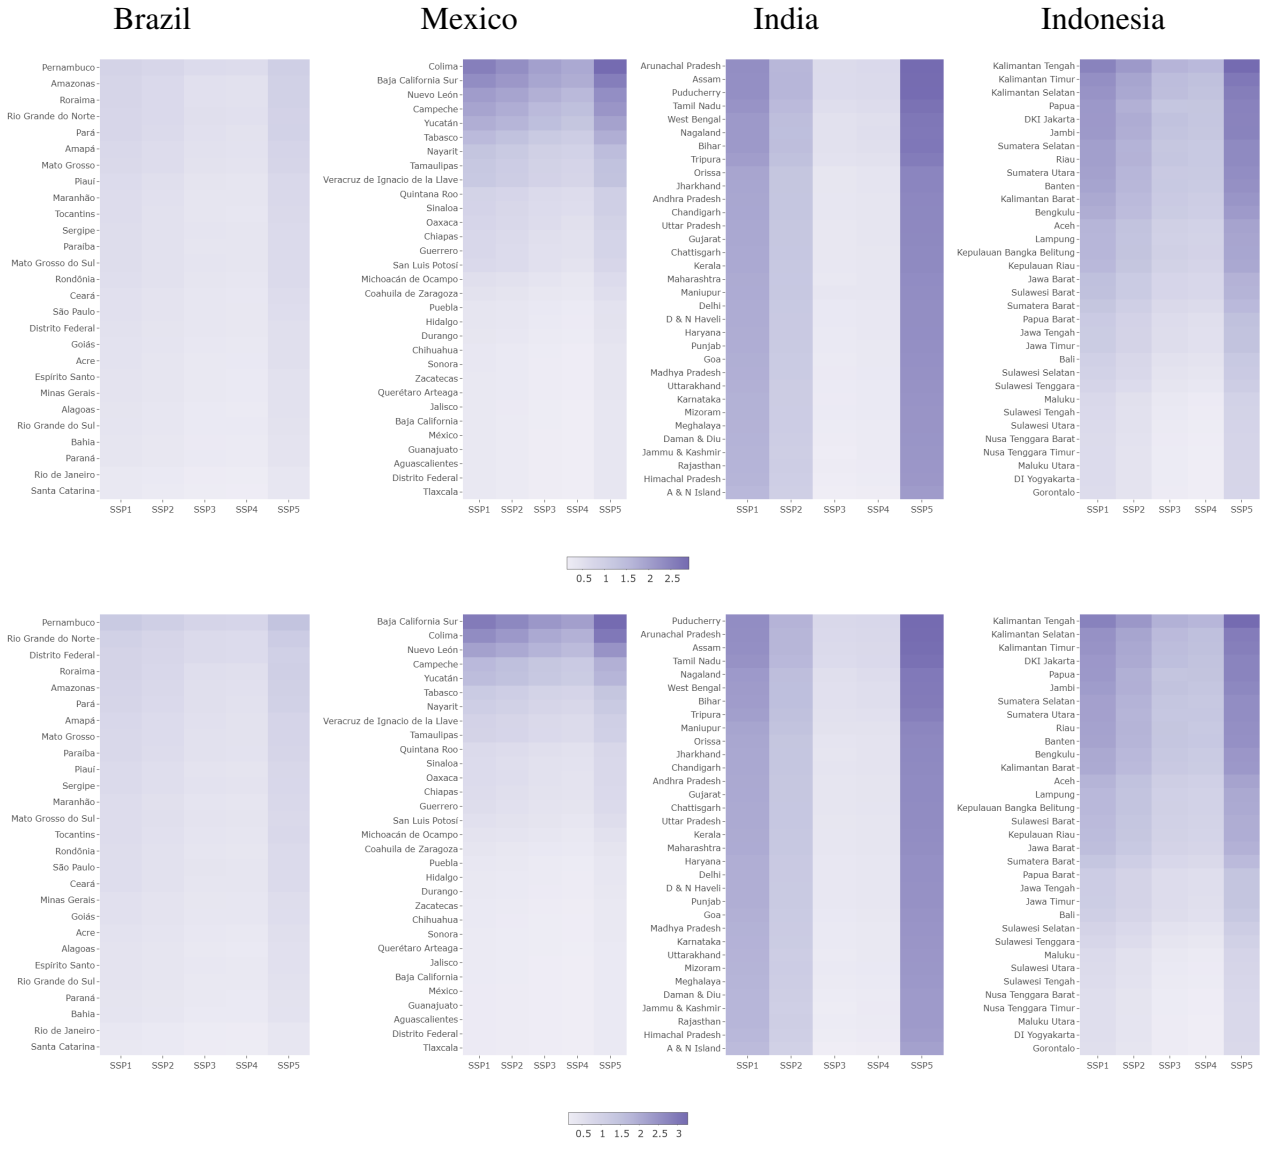

Supplementary Figure 7: Electricity change compared to historical levels - growth factors in the year 2040 under RCP4.5 and RCP8.5

Supplementary Table 14: Growth rate in electricity use: Brazil. Summary statistics computed on state-level averages.

| Variable     | Obs | Mean  | Std. Dev. | Min   | Max   | P25   | P50   | P75   |
|--------------|-----|-------|-----------|-------|-------|-------|-------|-------|
| RCP85 - SSP1 | 27  | 0.686 | 0.233     | 0.317 | 1.298 | 0.486 | 0.672 | 0.819 |
| RCP85 - SSP2 | 27  | 0.588 | 0.202     | 0.27  | 1.135 | 0.417 | 0.563 | 0.701 |
| RCP85 - SSP3 | 27  | 0.465 | 0.167     | 0.209 | 0.935 | 0.329 | 0.441 | 0.555 |
| RCP85 - SSP4 | 27  | 0.437 | 0.159     | 0.194 | 0.894 | 0.31  | 0.41  | 0.522 |
| RCP85 - SSP5 | 27  | 0.791 | 0.267     | 0.367 | 1.47  | 0.566 | 0.777 | 0.945 |
| RCP45 - SSP1 | 27  | 0.562 | 0.165     | 0.292 | 0.882 | 0.431 | 0.57  | 0.706 |
| RCP45 - SSP2 | 27  | 0.48  | 0.141     | 0.248 | 0.77  | 0.369 | 0.482 | 0.603 |
| RCP45 - SSP3 | 27  | 0.375 | 0.112     | 0.189 | 0.63  | 0.289 | 0.371 | 0.475 |
| RCP45 - SSP4 | 27  | 0.352 | 0.106     | 0.176 | 0.601 | 0.272 | 0.345 | 0.446 |
| RCP45 - SSP5 | 27  | 0.65  | 0.192     | 0.339 | 0.999 | 0.496 | 0.664 | 0.815 |

Note on interpretation. The value of 0.686 represents a 68.6% increase in 2040 compared to the latest wave.

Supplementary Table 15: Growth rate in electricity use: Mexico. Summary statistics computed on state-level averages.

| Variable     | Obs | Mean  | Std. Dev. | Min   | Max   | P25   | P50   | P75   |
|--------------|-----|-------|-----------|-------|-------|-------|-------|-------|
| RCP85 - SSP1 | 31  | 0.775 | 0.736     | 0.235 | 2.934 | 0.254 | 0.462 | 0.989 |
| RCP85 - SSP2 | 31  | 0.705 | 0.679     | 0.207 | 2.704 | 0.229 | 0.43  | 0.897 |
| RCP85 - SSP3 | 31  | 0.61  | 0.603     | 0.169 | 2.406 | 0.188 | 0.368 | 0.777 |
| RCP85 - SSP4 | 31  | 0.557 | 0.56      | 0.149 | 2.245 | 0.163 | 0.316 | 0.713 |
| RCP85 - SSP5 | 31  | 0.875 | 0.821     | 0.273 | 3.249 | 0.293 | 0.53  | 1.116 |
| RCP45 - SSP1 | 31  | 0.588 | 0.432     | 0.235 | 1.685 | 0.248 | 0.395 | 0.82  |
| RCP45 - SSP2 | 31  | 0.534 | 0.4       | 0.207 | 1.531 | 0.219 | 0.364 | 0.745 |
| RCP45 - SSP3 | 31  | 0.459 | 0.357     | 0.169 | 1.327 | 0.18  | 0.31  | 0.644 |
| RCP45 - SSP4 | 31  | 0.417 | 0.332     | 0.149 | 1.228 | 0.158 | 0.267 | 0.589 |
| RCP45 - SSP5 | 31  | 0.666 | 0.48      | 0.273 | 1.904 | 0.287 | 0.454 | 0.926 |

Note on interpretation. The value of 0.775 represents a 77.5% increase in 2040 compared to the latest wave.

We exclude Morelos from the computation as it is an outlier after the simulation.

Supplementary Table 16: Growth rate in electricity use: India. Summary statistics computed on state-level averages.

| Variable     | Obs | Mean  | Std. Dev. | Min   | Max   | P25   | P50   | P75   |
|--------------|-----|-------|-----------|-------|-------|-------|-------|-------|
| RCP85 - SSP1 | 34  | 2.236 | 0.133     | 1.92  | 2.511 | 2.146 | 2.226 | 2.285 |
| RCP85 - SSP2 | 34  | 1.904 | 0.114     | 1.631 | 2.146 | 1.825 | 1.896 | 1.964 |
| RCP85 - SSP3 | 34  | 1.427 | 0.09      | 1.211 | 1.618 | 1.369 | 1.42  | 1.489 |
| RCP85 - SSP4 | 34  | 1.446 | 0.091     | 1.226 | 1.637 | 1.385 | 1.44  | 1.485 |
| RCP85 - SSP5 | 34  | 2.52  | 0.149     | 2.169 | 2.827 | 2.419 | 2.508 | 2.573 |
| RCP45 - SSP1 | 34  | 2.172 | 0.114     | 1.92  | 2.41  | 2.088 | 2.148 | 2.201 |
| RCP45 - SSP2 | 34  | 1.848 | 0.097     | 1.631 | 2.048 | 1.779 | 1.836 | 1.873 |
| RCP45 - SSP3 | 34  | 1.381 | 0.076     | 1.211 | 1.541 | 1.33  | 1.372 | 1.399 |
| RCP45 - SSP4 | 34  | 1.4   | 0.078     | 1.226 | 1.566 | 1.345 | 1.387 | 1.418 |
| RCP45 - SSP5 | 34  | 2.449 | 0.127     | 2.169 | 2.713 | 2.354 | 2.421 | 2.483 |

Note on interpretation. The value of 2.236 represents a 223.6% increase in 2040 compared to the latest wave.

Supplementary Table 17: Growth rate in electricity use: Indonesia. Summary statistics computed on state-level averages.

| Variable     | Obs | Mean  | Std. Dev. | Min   | Max   | P25   | P50   | P75   |
|--------------|-----|-------|-----------|-------|-------|-------|-------|-------|
| RCP85 - SSP1 | 33  | 1.966 | 0.537     | 1.232 | 2.931 | 1.431 | 2.051 | 2.459 |
| RCP85 - SSP2 | 33  | 1.75  | 0.476     | 1.098 | 2.619 | 1.277 | 1.832 | 2.183 |
| RCP85 - SSP3 | 33  | 1.488 | 0.405     | 0.931 | 2.238 | 1.086 | 1.562 | 1.844 |
| RCP85 - SSP4 | 33  | 1.438 | 0.398     | 0.89  | 2.148 | 1.042 | 1.498 | 1.796 |
| RCP85 - SSP5 | 33  | 2.189 | 0.599     | 1.372 | 3.266 | 1.592 | 2.285 | 2.745 |
| RCP45 - SSP1 | 33  | 1.817 | 0.442     | 1.228 | 2.607 | 1.393 | 1.808 | 2.23  |
| RCP45 - SSP2 | 33  | 1.617 | 0.391     | 1.095 | 2.329 | 1.242 | 1.608 | 1.961 |
| RCP45 - SSP3 | 33  | 1.373 | 0.332     | 0.928 | 1.987 | 1.055 | 1.368 | 1.654 |
| RCP45 - SSP4 | 33  | 1.325 | 0.326     | 0.887 | 1.906 | 1.013 | 1.321 | 1.63  |
| RCP45 - SSP5 | 33  | 2.024 | 0.493     | 1.369 | 2.906 | 1.55  | 2.013 | 2.486 |

Note on interpretation. The value of 1.966 represents a 196.6% increase in 2040 compared to the latest wave.

Supplementary Table 18: Air-conditioning adoption: Brazil. Summary statistics computed on state-level averages.

| Variable     | Obs | Mean  | Std. Dev. | Min   | Max   | P25   | P50   | P75   |
|--------------|-----|-------|-----------|-------|-------|-------|-------|-------|
| RCP85 - SSP1 | 27  | 0.825 | 0.17      | 0.405 | 0.996 | 0.766 | 0.857 | 0.96  |
| RCP85 - SSP2 | 27  | 0.799 | 0.182     | 0.363 | 0.995 | 0.721 | 0.844 | 0.948 |
| RCP85 - SSP3 | 27  | 0.759 | 0.197     | 0.311 | 0.992 | 0.659 | 0.799 | 0.912 |
| RCP85 - SSP4 | 27  | 0.75  | 0.199     | 0.297 | 0.992 | 0.646 | 0.791 | 0.9   |
| RCP85 - SSP5 | 27  | 0.85  | 0.16      | 0.444 | 0.998 | 0.792 | 0.891 | 0.977 |
| RCP45 - SSP1 | 27  | 0.743 | 0.197     | 0.33  | 0.993 | 0.622 | 0.769 | 0.915 |
| RCP45 - SSP2 | 27  | 0.711 | 0.207     | 0.297 | 0.992 | 0.581 | 0.722 | 0.896 |
| RCP45 - SSP3 | 27  | 0.663 | 0.218     | 0.253 | 0.989 | 0.515 | 0.664 | 0.859 |
| RCP45 - SSP4 | 27  | 0.652 | 0.221     | 0.245 | 0.986 | 0.494 | 0.649 | 0.846 |
| RCP45 - SSP5 | 27  | 0.774 | 0.187     | 0.362 | 0.995 | 0.67  | 0.816 | 0.944 |

Note on interpretation. The value of 0.825 represents a 82.5% residential air-conditioning market saturation.



Supplementary Table 19: Air-conditioning adoption: Mexico. Summary statistics computed on state-level averages.

| Variable     | Obs | Mean  | Std. Dev. | Min | Max   | P25   | P50   | P75   |
|--------------|-----|-------|-----------|-----|-------|-------|-------|-------|
| RCP85 - SSP1 | 31  | 0.406 | 0.396     | 0   | 0.982 | 0.004 | 0.191 | 0.911 |
| RCP85 - SSP2 | 31  | 0.396 | 0.391     | 0   | 0.977 | 0.008 | 0.177 | 0.894 |
| RCP85 - SSP3 | 31  | 0.382 | 0.383     | 0   | 0.972 | 0.008 | 0.166 | 0.864 |
| RCP85 - SSP4 | 31  | 0.374 | 0.379     | 0   | 0.97  | 0.003 | 0.146 | 0.843 |
| RCP85 - SSP5 | 31  | 0.417 | 0.4       | 0   | 0.987 | 0.005 | 0.207 | 0.928 |
| RCP45 - SSP1 | 31  | 0.386 | 0.389     | 0   | 0.978 | 0.001 | 0.149 | 0.859 |
| RCP45 - SSP2 | 31  | 0.376 | 0.383     | 0   | 0.976 | 0.001 | 0.142 | 0.844 |
| RCP45 - SSP3 | 31  | 0.361 | 0.375     | 0   | 0.97  | 0.001 | 0.129 | 0.812 |
| RCP45 - SSP4 | 31  | 0.352 | 0.369     | 0   | 0.967 | 0.001 | 0.118 | 0.775 |
| RCP45 - SSP5 | 31  | 0.399 | 0.396     | 0   | 0.984 | 0.001 | 0.167 | 0.889 |

Note on interpretation. The value of 0.406 represents a 40.6% residential air-conditioning market saturation.

We exclude Morelos from the computation as it is an outlier after the simulation.

Supplementary Table 20: Air-conditioning adoption: India. Summary statistics computed on state-level averages.

| Variable     | Obs | Mean  | Std. Dev. | Min   | Max   | P25   | P50   | P75   |
|--------------|-----|-------|-----------|-------|-------|-------|-------|-------|
| RCP85 - SSP1 | 33  | 0.656 | 0.278     | 0.124 | 1     | 0.488 | 0.682 | 0.917 |
| RCP85 - SSP2 | 33  | 0.605 | 0.289     | 0.089 | 1     | 0.429 | 0.596 | 0.887 |
| RCP85 - SSP3 | 33  | 0.523 | 0.301     | 0.05  | 0.993 | 0.306 | 0.45  | 0.835 |
| RCP85 - SSP4 | 33  | 0.528 | 0.3       | 0.053 | 0.993 | 0.316 | 0.459 | 0.836 |
| RCP85 - SSP5 | 33  | 0.691 | 0.267     | 0.162 | 1     | 0.544 | 0.73  | 0.939 |
| RCP45 - SSP1 | 33  | 0.623 | 0.292     | 0.095 | 1     | 0.451 | 0.632 | 0.905 |
| RCP45 - SSP2 | 33  | 0.571 | 0.3       | 0.07  | 1     | 0.37  | 0.566 | 0.855 |
| RCP45 - SSP3 | 33  | 0.488 | 0.305     | 0.042 | 0.993 | 0.263 | 0.397 | 0.79  |
| RCP45 - SSP4 | 33  | 0.494 | 0.305     | 0.043 | 0.993 | 0.273 | 0.4   | 0.801 |
| RCP45 - SSP5 | 33  | 0.663 | 0.28      | 0.132 | 1     | 0.477 | 0.678 | 0.919 |

Note on interpretation. The value of 0.656 represents a 65.6% residential air-conditioning market saturation.

Supplementary Table 21: Air-conditioning adoption: Indonesia. Summary statistics computed on state-level averages.

| Variable     | Obs | Mean  | Std. Dev. | Min   | Max   | P25   | P50   | P75   |
|--------------|-----|-------|-----------|-------|-------|-------|-------|-------|
| RCP85 - SSP1 | 33  | 0.568 | 0.23      | 0.106 | 0.994 | 0.382 | 0.535 | 0.725 |
| RCP85 - SSP2 | 33  | 0.526 | 0.233     | 0.085 | 0.989 | 0.333 | 0.485 | 0.692 |
| RCP85 - SSP3 | 33  | 0.47  | 0.231     | 0.066 | 0.981 | 0.278 | 0.435 | 0.629 |
| RCP85 - SSP4 | 33  | 0.458 | 0.23      | 0.062 | 0.979 | 0.267 | 0.424 | 0.627 |
| RCP85 - SSP5 | 33  | 0.607 | 0.225     | 0.127 | 0.997 | 0.429 | 0.581 | 0.775 |
| RCP45 - SSP1 | 33  | 0.543 | 0.226     | 0.104 | 0.99  | 0.36  | 0.498 | 0.701 |
| RCP45 - SSP2 | 33  | 0.499 | 0.227     | 0.084 | 0.984 | 0.319 | 0.458 | 0.658 |
| RCP45 - SSP3 | 33  | 0.442 | 0.223     | 0.065 | 0.973 | 0.27  | 0.408 | 0.588 |
| RCP45 - SSP4 | 33  | 0.429 | 0.222     | 0.062 | 0.969 | 0.256 | 0.399 | 0.569 |
| RCP45 - SSP5 | 33  | 0.584 | 0.222     | 0.126 | 0.994 | 0.418 | 0.542 | 0.732 |

Note on interpretation. The value of 0.568 represents a 56.8% residential air-conditioning market saturation.

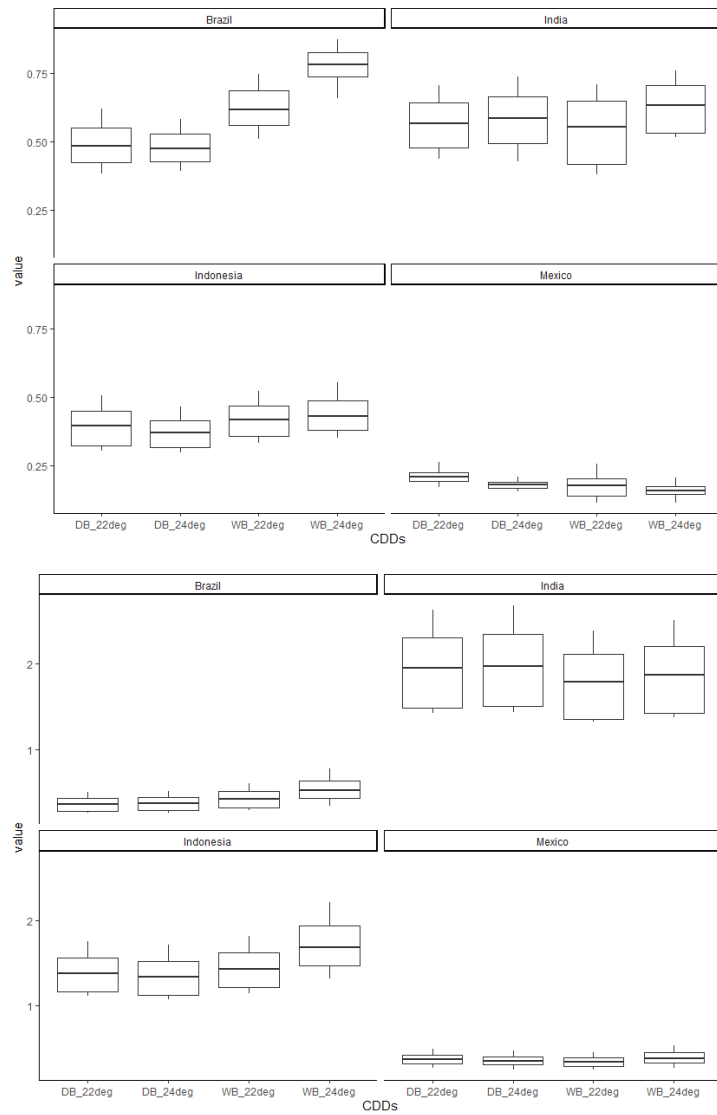

Supplementary Figure 8: Top panel: Predicted air-conditioning adoption rates in 2040 (between 0 and 1, full adoption). Bottom: Predicted growth rates of electricity demand. Sensitivity to temperature thresholds and to temperature measurement.
